# Supplementary material for: Exploration of the Potential Mechanisms of Wumei Pill for the Treatment of Ulcerative Colitis by Network Pharmacology
Source: Gastroenterol Res Pract. 2021 Dec 21;2021:4227668. doi: 10.1155/2021/4227668 (PMC8714398; doi:10.1155/2021/4227668)
Supplement: Supplementary Materials — The 129 active ingredients of WMP and the 1710 target can be found in supplementary A and supplementary B, respectively. Target genes related to UC can be found in supplementary C. [file 4227668.f1.zip]

Archive with 3 entries (3 files):
- supplementary A.txt
- supplementary B.txt
- supplementary C.txt
