# Supplementary material for: Exploration of the Potential Mechanisms of Wumei Pill for the Treatment of Ulcerative Colitis by Network Pharmacology
Source: Gastroenterol Res Pract. 2021 Dec 21;2021:4227668. doi: 10.1155/2021/4227668 (PMC8714398; doi:10.1155/2021/4227668)
Supplement: Supplementary Materials — The 129 active ingredients of WMP and the 1710 target can be found in supplementary A and supplementary B, respectively. Target genes related to UC can be found in supplementary C. [file 4227668.f1.zip › supplementary A.txt]

Supplementary A: Details of the 129 active ingredients of WMP
Herb	Mol ID	Molecule Name	OB(%)	DL
Wumei	MOL001040	(2R)-5,7-dihydroxy-2-(4-hydroxyphenyl)chroman-4-one	42.36332114	0.21141
Wumei	MOL008601	Methyl arachidonate	46.89969301	0.23381
Wumei	MOL000422	kaempferol	41.88224954	0.24066
Wumei	MOL000098	quercetin	46.43334812	0.27525
Wumei	MOL000953	CLR	37.87389754	0.67677
Wumei	MOL005043	campest-5-en-3beta-ol	37.57681789	0.71481
Wumei	MOL000358	beta-sitosterol	36.91390583	0.75123
Wumei	MOL000449	Stigmasterol	43.82985158	0.75665
Xixin	MOL012140	4,9-dimethoxy-1-vinyl-$b-carboline	65.30102526	0.19237
Xixin	MOL000422	kaempferol	41.88224954	0.24066
Xixin	MOL002501	[(1S)-3-[(E)-but-2-enyl]-2-methyl-4-oxo-1-cyclopent-2-enyl] (1R,3R)-3-[(E)-3-methoxy-2-methyl-3-oxoprop-1-enyl]-2,2-dimethylcyclopropane-1-carboxylate	62.51582978	0.30983
Xixin	MOL002962	(3S)-7-hydroxy-3-(2,3,4-trimethoxyphenyl)chroman-4-one	48.23030407	0.32931
Xixin	MOL001460	Cryptopin	78.74264521	0.72233
Xixin	MOL012141	Caribine	37.06465824	0.82656
Xixin	MOL001558	sesamin	56.5470561	0.82722
Xixin	MOL009849	ZINC05223929	31.5711208	0.82723
Guizhi	MOL000073	ent-Epicatechin	48.95984114	0.24162
Guizhi	MOL000492	(+)-catechin	54.82643405	0.24164
Guizhi	MOL001736	(-)-taxifolin	60.50621692	0.27342
Guizhi	MOL004576	taxifolin	57.84156034	0.27345
Guizhi	MOL000359	sitosterol	36.91390583	0.7512
Guizhi	MOL000358	beta-sitosterol	36.91390583	0.75123
Guizhi	MOL011169	Peroxyergosterol	44.39151838	0.82
Huanglian	MOL000622	Magnograndiolide	63.70888436	0.18833
Huanglian	MOL008647	Moupinamide	86.71215907	0.26454
Huanglian	MOL000098	quercetin	46.43334812	0.27525
Huanglian	MOL000785	palmatine	64.60111294	0.64524
Huanglian	MOL000762	Palmidin A	35.35818795	0.65003
Huanglian	MOL002894	berberrubine	35.73551127	0.7269
Huanglian	MOL013352	Obacunone	43.28625365	0.76724
Huanglian	MOL002903	(R)-Canadine	55.36687348	0.77465
Huanglian	MOL002907	Corchoroside A_qt	104.9542429	0.77599
Huanglian	MOL002897	epiberberine	43.09233228	0.7761
Huanglian	MOL001454	berberine	36.86124504	0.77665
Huanglian	MOL002904	Berlambine	36.68090144	0.81596
Huanglian	MOL001458	coptisine	30.671852	0.85647
Huanglian	MOL002668	Worenine	45.833181	0.86552
Huangbai	MOL000622	Magnograndiolide	63.70888436	0.18833
Huangbai	MOL002663	Skimmianin	40.13654637	0.19638
Huangbai	MOL002652	delta7-Dehydrosophoramine	54.45026528	0.25296
Huangbai	MOL000098	quercetin	46.43334812	0.27525
Huangbai	MOL002644	Phellopterin	40.18555771	0.27878
Huangbai	MOL001131	phellamurin_qt	56.59655543	0.39283
Huangbai	MOL002651	Dehydrotanshinone II A	43.76228599	0.40019
Huangbai	MOL002641	Phellavin_qt	35.85997645	0.44228
Huangbai	MOL000790	Isocorypalmine	35.76844006	0.59227
Huangbai	MOL002662	rutaecarpine	40.30045969	0.59819
Huangbai	MOL002672	Hericenone H	38.99689238	0.63395
Huangbai	MOL000785	palmatine	64.60111294	0.64524
Huangbai	MOL000762	Palmidin A	35.35818795	0.65003
Huangbai	MOL002671	Candletoxin A	31.81119618	0.68823
Huangbai	MOL002659	kihadanin A	31.60457831	0.70223
Huangbai	MOL005438	campesterol	37.57681789	0.71488
Huangbai	MOL006422	thalifendine	44.41094353	0.72588
Huangbai	MOL002894	berberrubine	35.73551127	0.7269
Huangbai	MOL001771	poriferast-5-en-3beta-ol	36.91390583	0.75034
Huangbai	MOL002643	delta 7-stigmastenol	37.42312067	0.75103
Huangbai	MOL000358	beta-sitosterol	36.91390583	0.75123
Huangbai	MOL000449	Stigmasterol	43.82985158	0.75665
Huangbai	MOL013352	Obacunone	43.28625365	0.76724
Huangbai	MOL001455	(S)-Canadine	53.83441524	0.77467
Huangbai	MOL001454	berberine	36.86124504	0.77665
Huangbai	MOL006401	melianone	40.52938372	0.77799
Huangbai	MOL002666	Chelerythrine	34.18377333	0.77992
Huangbai	MOL002670	Cavidine	35.64183046	0.80513
Huangbai	MOL002656	dihydroniloticin	36.42587559	0.81454
Huangbai	MOL006392	dihydroniloticin	36.42587559	0.8152
Huangbai	MOL006413	phellochin	35.41196286	0.81528
Huangbai	MOL002636	Kihadalactone A	34.20897014	0.81734
Huangbai	MOL002660	niloticin	41.41426899	0.81833
Huangbai	MOL000787	Fumarine	59.26250458	0.82694
Huangbai	MOL002673	Hispidone	36.18095284	0.82983
Huangbai	MOL001458	coptisine	30.671852	0.85647
Huangbai	MOL002668	Worenine	45.833181	0.86552
Dangui	MOL000358	beta-sitosterol	36.91390583	0.75123
Dangui	MOL000449	Stigmasterol	43.82985158	0.75665
Rensen	MOL005318	Dianthramine	40.44641187	0.19676
Rensen	MOL005320	arachidonate	45.57324991	0.20491
Rensen	MOL005308	Aposiopolamine	66.64690713	0.21999
Rensen	MOL000422	kaempferol	41.88224954	0.24066
Rensen	MOL005356	Girinimbin	61.21530251	0.31484
Rensen	MOL005321	Frutinone A	65.9037307	0.34184
Rensen	MOL002879	Diop	43.59332547	0.39247
Rensen	MOL005314	Celabenzine	101.8825954	0.48772
Rensen	MOL003648	Inermin	65.83093145	0.53754
Rensen	MOL005384	suchilactone	57.51882425	0.55573
Rensen	MOL005344	ginsenoside rh2	36.31951162	0.55868
Rensen	MOL004492	Chrysanthemaxanthin	38.72398115	0.58352
Rensen	MOL005360	malkangunin	57.71384384	0.62642
Rensen	MOL000358	beta-sitosterol	36.91390583	0.75123
Rensen	MOL005399	alexandrin_qt	36.91390583	0.75268
Rensen	MOL000449	Stigmasterol	43.82985158	0.75665
Rensen	MOL005348	Ginsenoside-Rh4_qt	31.11214828	0.77829
Rensen	MOL005401	ginsenoside Rg5_qt	39.56307142	0.78506
Rensen	MOL005376	Panaxadiol	33.0879606	0.79404
Rensen	MOL005317	Deoxyharringtonine	39.27443988	0.8116
Rensen	MOL000787	Fumarine	59.26250458	0.82694
Rensen	MOL005357	Gomisin B	31.99042428	0.82858
Huajiao	MOL013271	Kokusaginin	66.67607094	0.19584
Huajiao	MOL002663	Skimmianin	40.13654637	0.19638
Huajiao	MOL002881	Diosmetin	31.13794879	0.27442
Huajiao	MOL000098	quercetin	46.43334812	0.27525
Huajiao	MOL000358	beta-sitosterol	36.91390583	0.75123
Ganjiang	MOL002514	Sexangularetin	62.85791915	0.2968
Ganjiang	MOL002464	1-Monolinolein	37.17662836	0.30249
Ganjiang	MOL002501	[(1S)-3-[(E)-but-2-enyl]-2-methyl-4-oxo-1-cyclopent-2-enyl] (1R,3R)-3-[(E)-3-methoxy-2-methyl-3-oxoprop-1-enyl]-2,2-dimethylcyclopropane-1-carboxylate	62.51582978	0.30983
Ganjiang	MOL000359	sitosterol	36.91390583	0.7512
Ganjiang	MOL000358	beta-sitosterol	36.91390583	0.75123
Fuzi	MOL002394	Demethyldelavaine B	34.5207323	0.18141
Fuzi	MOL002393	Demethyldelavaine A	34.5207323	0.1819
Fuzi	MOL002423	jesaconitine	33.41257911	0.19087
Fuzi	MOL002211	11,14-eicosadienoic acid	39.99355408	0.20044
Fuzi	MOL002419	(R)-Norcoclaurine	82.54295265	0.20872
Fuzi	MOL002433	(3R,8S,9R,10R,13R,14S,17R)-3-hydroxy-4,4,9,13,14-pentamethyl-17-[(E,2R)-6-methyl-7-[(2R,3R,4S,5S,6R)-3,4,5-trihydroxy-6-[[(2R,3R,4S,5S,6R)-3,4,5-trihydroxy-6-(hydroxymethyl)oxan-2-yl]oxymethyl]oxan-2-yl]oxyhept-5-en-2-yl]-1,2,3,7,8,10,12,15,16,17-decahydr	41.52216597	0.21712
Fuzi	MOL002416	deoxyaconitine	30.95921926	0.24469
Fuzi	MOL002421	ignavine	84.07947669	0.24798
Fuzi	MOL000538	hypaconitine	31.38845938	0.26085
Fuzi	MOL002388	Delphin_qt	57.76170444	0.2786
Fuzi	MOL002395	Deoxyandrographolide	56.3040973	0.31451
Fuzi	MOL002398	Karanjin	69.55686505	0.33616
Fuzi	MOL002392	Deltoin	46.69280884	0.36837
Fuzi	MOL002406	2,7-Dideacetyl-2,7-dibenzoyl-taxayunnanine F	39.42847682	0.37822
Fuzi	MOL002410	benzoylnapelline	34.05649896	0.52933
Fuzi	MOL002415	6-Demethyldesoline	51.8716425	0.65822
Fuzi	MOL002422	isotalatizidine	50.82413548	0.73291
Fuzi	MOL002397	karakoline	51.73089593	0.73447
Fuzi	MOL000359	sitosterol	36.91390583	0.7512
Fuzi	MOL002434	Carnosifloside I_qt	38.15575048	0.79654
Fuzi	MOL002401	Neokadsuranic acid B	43.09828612	0.85195
