# Supplementary material for: Exploration of the Potential Mechanisms of Wumei Pill for the Treatment of Ulcerative Colitis by Network Pharmacology
Source: Gastroenterol Res Pract. 2021 Dec 21;2021:4227668. doi: 10.1155/2021/4227668 (PMC8714398; doi:10.1155/2021/4227668)
Supplement: Supplementary Materials — The 129 active ingredients of WMP and the 1710 target can be found in supplementary A and supplementary B, respectively. Target genes related to UC can be found in supplementary C. [file 4227668.f1.zip › supplementary B.txt]

Supplementary B: Details of the 1710 target genes correpending to WMP
Drug	MolId	MolName	Symbol
danggui	MOL000358	beta-sitosterol	PGR
danggui	MOL000358	beta-sitosterol	NCOA2
danggui	MOL000358	beta-sitosterol	PTGS1
danggui	MOL000358	beta-sitosterol	PTGS2
danggui	MOL000358	beta-sitosterol	HSP90AA1
danggui	MOL000358	beta-sitosterol	KCNH2
danggui	MOL000358	beta-sitosterol	PRKACA
danggui	MOL000358	beta-sitosterol	DRD1
danggui	MOL000358	beta-sitosterol	CHRM3
danggui	MOL000358	beta-sitosterol	CHRM1
danggui	MOL000358	beta-sitosterol	SCN5A
danggui	MOL000358	beta-sitosterol	CHRM4
danggui	MOL000358	beta-sitosterol	PDE3A
danggui	MOL000358	beta-sitosterol	ADRA1A
danggui	MOL000358	beta-sitosterol	CHRM2
danggui	MOL000358	beta-sitosterol	ADRA1B
danggui	MOL000358	beta-sitosterol	ADRB2
danggui	MOL000358	beta-sitosterol	CHRNA2
danggui	MOL000358	beta-sitosterol	SLC6A4
danggui	MOL000358	beta-sitosterol	OPRM1
danggui	MOL000358	beta-sitosterol	CHRNA7
danggui	MOL000358	beta-sitosterol	BCL2
danggui	MOL000358	beta-sitosterol	BAX
danggui	MOL000358	beta-sitosterol	CASP9
danggui	MOL000358	beta-sitosterol	JUN
danggui	MOL000358	beta-sitosterol	CASP3
danggui	MOL000358	beta-sitosterol	CASP8
danggui	MOL000358	beta-sitosterol	PRKCA
danggui	MOL000358	beta-sitosterol	PON1
danggui	MOL000358	beta-sitosterol	MAP2
danggui	MOL000449	Stigmasterol	PGR
danggui	MOL000449	Stigmasterol	NR3C2
danggui	MOL000449	Stigmasterol	NCOA2
danggui	MOL000449	Stigmasterol	SERTAD1
danggui	MOL000449	Stigmasterol	IGHG1
danggui	MOL000449	Stigmasterol	RXRA
danggui	MOL000449	Stigmasterol	NCOA1
danggui	MOL000449	Stigmasterol	PTGS1
danggui	MOL000449	Stigmasterol	PTGS2
danggui	MOL000449	Stigmasterol	ADRA2A
danggui	MOL000449	Stigmasterol	SLC6A2
danggui	MOL000449	Stigmasterol	SLC6A3
danggui	MOL000449	Stigmasterol	ADRB2
danggui	MOL000449	Stigmasterol	AKR1B1
danggui	MOL000449	Stigmasterol	PLAU
danggui	MOL000449	Stigmasterol	LTA4H
danggui	MOL000449	Stigmasterol	MAOB
danggui	MOL000449	Stigmasterol	MAOA
danggui	MOL000449	Stigmasterol	PRKACA
danggui	MOL000449	Stigmasterol	CTRB1
danggui	MOL000449	Stigmasterol	CHRM3
danggui	MOL000449	Stigmasterol	CHRM1
danggui	MOL000449	Stigmasterol	ADRB1
danggui	MOL000449	Stigmasterol	SCN5A
danggui	MOL000449	Stigmasterol	ADRA1A
danggui	MOL000449	Stigmasterol	CHRM2
danggui	MOL000449	Stigmasterol	ADRA1B
danggui	MOL000449	Stigmasterol	CHRNA7
fuzi	MOL002211	11,14-eicosadienoic acid	NCOA2
fuzi	MOL002388	Delphin_qt	PTGS1
fuzi	MOL002388	Delphin_qt	PTGS2
fuzi	MOL002388	Delphin_qt	CA2
fuzi	MOL002388	Delphin_qt	HSP90AA1
fuzi	MOL002388	Delphin_qt	NCOA2
fuzi	MOL002392	Deltoin	PTGS1
fuzi	MOL002392	Deltoin	F2
fuzi	MOL002392	Deltoin	SCN5A
fuzi	MOL002392	Deltoin	F10
fuzi	MOL002392	Deltoin	PTGS2
fuzi	MOL002392	Deltoin	ACHE
fuzi	MOL002392	Deltoin	ADRA1B
fuzi	MOL002392	Deltoin	ADRB2
fuzi	MOL002392	Deltoin	DPP4
fuzi	MOL002392	Deltoin	PRSS1
fuzi	MOL002392	Deltoin	PCP4
fuzi	MOL002395	Deoxyandrographolide	PTGS2
fuzi	MOL002395	Deoxyandrographolide	PGR
fuzi	MOL002395	Deoxyandrographolide	NCOA2
fuzi	MOL002395	Deoxyandrographolide	NCOA1
fuzi	MOL002398	Karanjin	PTGS1
fuzi	MOL002398	Karanjin	ESR1
fuzi	MOL002398	Karanjin	PTGS2
fuzi	MOL002398	Karanjin	CHEK1
fuzi	MOL000359	sitosterol	PGR
fuzi	MOL000359	sitosterol	NCOA2
fuzi	MOL000359	sitosterol	NR3C2
ganjiang	MOL002464	1-Monolinolein	PTGS1
ganjiang	MOL002501	[(1S)-3-[(E)-but-2-enyl]-2-methyl-4-oxo-1-cyclopent-2-enyl] (1R,3R)-3-[(E)-3-methoxy-2-methyl-3-oxoprop-1-enyl]-2,2-dimethylcyclopropane-1-carboxylate	PTGS2
ganjiang	MOL002501	[(1S)-3-[(E)-but-2-enyl]-2-methyl-4-oxo-1-cyclopent-2-enyl] (1R,3R)-3-[(E)-3-methoxy-2-methyl-3-oxoprop-1-enyl]-2,2-dimethylcyclopropane-1-carboxylate	CA2
ganjiang	MOL002501	[(1S)-3-[(E)-but-2-enyl]-2-methyl-4-oxo-1-cyclopent-2-enyl] (1R,3R)-3-[(E)-3-methoxy-2-methyl-3-oxoprop-1-enyl]-2,2-dimethylcyclopropane-1-carboxylate	NCOA2
ganjiang	MOL002514	Sexangularetin	NOS2
ganjiang	MOL002514	Sexangularetin	PTGS1
ganjiang	MOL002514	Sexangularetin	AR
ganjiang	MOL002514	Sexangularetin	PTGS2
ganjiang	MOL002514	Sexangularetin	DPP4
ganjiang	MOL002514	Sexangularetin	HSP90AA1
ganjiang	MOL002514	Sexangularetin	CDK2
ganjiang	MOL002514	Sexangularetin	PRSS1
ganjiang	MOL000358	beta-sitosterol	PGR
ganjiang	MOL000358	beta-sitosterol	NCOA2
ganjiang	MOL000358	beta-sitosterol	PTGS1
ganjiang	MOL000358	beta-sitosterol	PTGS2
ganjiang	MOL000358	beta-sitosterol	HSP90AA1
ganjiang	MOL000358	beta-sitosterol	KCNH2
ganjiang	MOL000358	beta-sitosterol	PRKACA
ganjiang	MOL000358	beta-sitosterol	DRD1
ganjiang	MOL000358	beta-sitosterol	CHRM3
ganjiang	MOL000358	beta-sitosterol	CHRM1
ganjiang	MOL000358	beta-sitosterol	SCN5A
ganjiang	MOL000358	beta-sitosterol	CHRM4
ganjiang	MOL000358	beta-sitosterol	PDE3A
ganjiang	MOL000358	beta-sitosterol	ADRA1A
ganjiang	MOL000358	beta-sitosterol	CHRM2
ganjiang	MOL000358	beta-sitosterol	ADRA1B
ganjiang	MOL000358	beta-sitosterol	ADRB2
ganjiang	MOL000358	beta-sitosterol	CHRNA2
ganjiang	MOL000358	beta-sitosterol	SLC6A4
ganjiang	MOL000358	beta-sitosterol	OPRM1
ganjiang	MOL000358	beta-sitosterol	CHRNA7
ganjiang	MOL000358	beta-sitosterol	BCL2
ganjiang	MOL000358	beta-sitosterol	BAX
ganjiang	MOL000358	beta-sitosterol	CASP9
ganjiang	MOL000358	beta-sitosterol	JUN
ganjiang	MOL000358	beta-sitosterol	CASP3
ganjiang	MOL000358	beta-sitosterol	CASP8
ganjiang	MOL000358	beta-sitosterol	PRKCA
ganjiang	MOL000358	beta-sitosterol	PON1
ganjiang	MOL000358	beta-sitosterol	MAP2
ganjiang	MOL000359	sitosterol	PGR
ganjiang	MOL000359	sitosterol	NCOA2
ganjiang	MOL000359	sitosterol	NR3C2
guizhi	MOL001736	(-)-taxifolin	PTGS1
guizhi	MOL001736	(-)-taxifolin	PTGS2
guizhi	MOL001736	(-)-taxifolin	HSP90AA1
guizhi	MOL000358	beta-sitosterol	PGR
guizhi	MOL000358	beta-sitosterol	NCOA2
guizhi	MOL000358	beta-sitosterol	PTGS1
guizhi	MOL000358	beta-sitosterol	PTGS2
guizhi	MOL000358	beta-sitosterol	HSP90AA1
guizhi	MOL000358	beta-sitosterol	KCNH2
guizhi	MOL000358	beta-sitosterol	PRKACA
guizhi	MOL000358	beta-sitosterol	DRD1
guizhi	MOL000358	beta-sitosterol	CHRM3
guizhi	MOL000358	beta-sitosterol	CHRM1
guizhi	MOL000358	beta-sitosterol	SCN5A
guizhi	MOL000358	beta-sitosterol	CHRM4
guizhi	MOL000358	beta-sitosterol	PDE3A
guizhi	MOL000358	beta-sitosterol	ADRA1A
guizhi	MOL000358	beta-sitosterol	CHRM2
guizhi	MOL000358	beta-sitosterol	ADRA1B
guizhi	MOL000358	beta-sitosterol	ADRB2
guizhi	MOL000358	beta-sitosterol	CHRNA2
guizhi	MOL000358	beta-sitosterol	SLC6A4
guizhi	MOL000358	beta-sitosterol	OPRM1
guizhi	MOL000358	beta-sitosterol	CHRNA7
guizhi	MOL000358	beta-sitosterol	BCL2
guizhi	MOL000358	beta-sitosterol	BAX
guizhi	MOL000358	beta-sitosterol	CASP9
guizhi	MOL000358	beta-sitosterol	JUN
guizhi	MOL000358	beta-sitosterol	CASP3
guizhi	MOL000358	beta-sitosterol	CASP8
guizhi	MOL000358	beta-sitosterol	PRKCA
guizhi	MOL000358	beta-sitosterol	PON1
guizhi	MOL000358	beta-sitosterol	MAP2
guizhi	MOL000359	sitosterol	PGR
guizhi	MOL000359	sitosterol	NCOA2
guizhi	MOL000359	sitosterol	NR3C2
guizhi	MOL000492	(+)-catechin	PTGS1
guizhi	MOL000492	(+)-catechin	ESR1
guizhi	MOL000492	(+)-catechin	PTGS2
guizhi	MOL000492	(+)-catechin	HSP90AA1
guizhi	MOL000492	(+)-catechin	DPEP1
guizhi	MOL000492	(+)-catechin	PRKACA
guizhi	MOL000492	(+)-catechin	NCOA2
guizhi	MOL000492	(+)-catechin	PCP4
guizhi	MOL000492	(+)-catechin	RXRA
guizhi	MOL000492	(+)-catechin	SERTAD1
guizhi	MOL000492	(+)-catechin	HAS2
guizhi	MOL000073	ent-Epicatechin	PTGS1
guizhi	MOL000073	ent-Epicatechin	ESR1
guizhi	MOL000073	ent-Epicatechin	PTGS2
guizhi	MOL000073	ent-Epicatechin	HSP90AA1
guizhi	MOL000073	ent-Epicatechin	DPEP1
guizhi	MOL000073	ent-Epicatechin	PRKACA
guizhi	MOL004576	taxifolin	PTGS1
guizhi	MOL004576	taxifolin	PTGS2
guizhi	MOL004576	taxifolin	HSP90AA1
guizhi	MOL004576	taxifolin	RXRA
guizhi	MOL004576	taxifolin	AKR1B1
guizhi	MOL004576	taxifolin	RELA
guizhi	MOL004576	taxifolin	ICAM1
guizhi	MOL004576	taxifolin	DGAT2
guizhi	MOL004576	taxifolin	MTTP
guizhi	MOL004576	taxifolin	APOB
huajiao	MOL013271	Kokusaginin	RXRA
huajiao	MOL013271	Kokusaginin	HSP90AA1
huajiao	MOL013271	Kokusaginin	PRKACA
huajiao	MOL002663	Skimmianin	RXRA
huajiao	MOL002663	Skimmianin	HSP90AA1
huajiao	MOL002663	Skimmianin	PRKACA
huajiao	MOL002881	Diosmetin	NOS2
huajiao	MOL002881	Diosmetin	PTGS1
huajiao	MOL002881	Diosmetin	PTGS2
huajiao	MOL002881	Diosmetin	DPP4
huajiao	MOL002881	Diosmetin	HSP90AA1
huajiao	MOL002881	Diosmetin	PRKACA
huajiao	MOL002881	Diosmetin	PRSS1
huajiao	MOL002881	Diosmetin	NCOA2
huajiao	MOL002881	Diosmetin	NCOA1
huajiao	MOL002881	Diosmetin	PCP4
huajiao	MOL000358	beta-sitosterol	PGR
huajiao	MOL000358	beta-sitosterol	NCOA2
huajiao	MOL000358	beta-sitosterol	PTGS1
huajiao	MOL000358	beta-sitosterol	PTGS2
huajiao	MOL000358	beta-sitosterol	HSP90AA1
huajiao	MOL000358	beta-sitosterol	KCNH2
huajiao	MOL000358	beta-sitosterol	PRKACA
huajiao	MOL000358	beta-sitosterol	DRD1
huajiao	MOL000358	beta-sitosterol	CHRM3
huajiao	MOL000358	beta-sitosterol	CHRM1
huajiao	MOL000358	beta-sitosterol	SCN5A
huajiao	MOL000358	beta-sitosterol	CHRM4
huajiao	MOL000358	beta-sitosterol	PDE3A
huajiao	MOL000358	beta-sitosterol	ADRA1A
huajiao	MOL000358	beta-sitosterol	CHRM2
huajiao	MOL000358	beta-sitosterol	ADRA1B
huajiao	MOL000358	beta-sitosterol	ADRB2
huajiao	MOL000358	beta-sitosterol	CHRNA2
huajiao	MOL000358	beta-sitosterol	SLC6A4
huajiao	MOL000358	beta-sitosterol	OPRM1
huajiao	MOL000358	beta-sitosterol	CHRNA7
huajiao	MOL000358	beta-sitosterol	BCL2
huajiao	MOL000358	beta-sitosterol	BAX
huajiao	MOL000358	beta-sitosterol	CASP9
huajiao	MOL000358	beta-sitosterol	JUN
huajiao	MOL000358	beta-sitosterol	CASP3
huajiao	MOL000358	beta-sitosterol	CASP8
huajiao	MOL000358	beta-sitosterol	PRKCA
huajiao	MOL000358	beta-sitosterol	PON1
huajiao	MOL000358	beta-sitosterol	MAP2
huajiao	MOL000098	quercetin	PTGS1
huajiao	MOL000098	quercetin	AR
huajiao	MOL000098	quercetin	PPARG
huajiao	MOL000098	quercetin	PTGS2
huajiao	MOL000098	quercetin	HSP90AA1
huajiao	MOL000098	quercetin	NCOA2
huajiao	MOL000098	quercetin	DPP4
huajiao	MOL000098	quercetin	AKR1B1
huajiao	MOL000098	quercetin	PRSS1
huajiao	MOL000098	quercetin	TOP2A
huajiao	MOL000098	quercetin	F2
huajiao	MOL000098	quercetin	KCNH2
huajiao	MOL000098	quercetin	SCN5A
huajiao	MOL000098	quercetin	F10
huajiao	MOL000098	quercetin	ADRB2
huajiao	MOL000098	quercetin	MMP3
huajiao	MOL000098	quercetin	PRKACA
huajiao	MOL000098	quercetin	F7
huajiao	MOL000098	quercetin	RXRA
huajiao	MOL000098	quercetin	ACHE
huajiao	MOL000098	quercetin	MAOB
huajiao	MOL000098	quercetin	RELA
huajiao	MOL000098	quercetin	EGFR
huajiao	MOL000098	quercetin	AKT1
huajiao	MOL000098	quercetin	SERTAD1
huajiao	MOL000098	quercetin	CCND1
huajiao	MOL000098	quercetin	BCL2
huajiao	MOL000098	quercetin	BCL2L1
huajiao	MOL000098	quercetin	FOS
huajiao	MOL000098	quercetin	CDKN1A
huajiao	MOL000098	quercetin	EIF6
huajiao	MOL000098	quercetin	BAX
huajiao	MOL000098	quercetin	CASP9
huajiao	MOL000098	quercetin	PLAU
huajiao	MOL000098	quercetin	MMP2
huajiao	MOL000098	quercetin	MMP9
huajiao	MOL000098	quercetin	MAPK1
huajiao	MOL000098	quercetin	IL10RB
huajiao	MOL000098	quercetin	RB1
huajiao	MOL000098	quercetin	TNFAIP6
huajiao	MOL000098	quercetin	JUN
huajiao	MOL000098	quercetin	IL6ST
huajiao	MOL000098	quercetin	AHSA1
huajiao	MOL000098	quercetin	CASP3
huajiao	MOL000098	quercetin	TP53
huajiao	MOL000098	quercetin	ELK1
huajiao	MOL000098	quercetin	NFKBIA
huajiao	MOL000098	quercetin	ODC1
huajiao	MOL000098	quercetin	CASP8
huajiao	MOL000098	quercetin	TOP1
huajiao	MOL000098	quercetin	RAF1
huajiao	MOL000098	quercetin	SOD1
huajiao	MOL000098	quercetin	PRKCA
huajiao	MOL000098	quercetin	MMP1
huajiao	MOL000098	quercetin	HIF1A
huajiao	MOL000098	quercetin	STAT1
huajiao	MOL000098	quercetin	RUNX1T1
huajiao	MOL000098	quercetin	CDK1
huajiao	MOL000098	quercetin	HSPA5
huajiao	MOL000098	quercetin	ERBB2
huajiao	MOL000098	quercetin	PPARG
huajiao	MOL000098	quercetin	ACACA
huajiao	MOL000098	quercetin	HMOX1
huajiao	MOL000098	quercetin	CYP3A4
huajiao	MOL000098	quercetin	CAV1
huajiao	MOL000098	quercetin	MYC
huajiao	MOL000098	quercetin	F3
huajiao	MOL000098	quercetin	GJA1
huajiao	MOL000098	quercetin	CYP1A1
huajiao	MOL000098	quercetin	ICAM1
huajiao	MOL000098	quercetin	IL1B
huajiao	MOL000098	quercetin	CCL2
huajiao	MOL000098	quercetin	SELE
huajiao	MOL000098	quercetin	VCAM1
huajiao	MOL000098	quercetin	CXCL8
huajiao	MOL000098	quercetin	PRKCB
huajiao	MOL000098	quercetin	BIRC5
huajiao	MOL000098	quercetin	DUOX2
huajiao	MOL000098	quercetin	NOS3
huajiao	MOL000098	quercetin	HSPB1
huajiao	MOL000098	quercetin	IL2
huajiao	MOL000098	quercetin	NR1I2
huajiao	MOL000098	quercetin	CYP1B1
huajiao	MOL000098	quercetin	CCNB1
huajiao	MOL000098	quercetin	PLAT
huajiao	MOL000098	quercetin	THBD
huajiao	MOL000098	quercetin	SERPINE1
huajiao	MOL000098	quercetin	IFNG
huajiao	MOL000098	quercetin	ALOX5
huajiao	MOL000098	quercetin	IL1A
huajiao	MOL000098	quercetin	MPO
huajiao	MOL000098	quercetin	TOP2A
huajiao	MOL000098	quercetin	NCF1
huajiao	MOL000098	quercetin	ABCG2
huajiao	MOL000098	quercetin	HAS2
huajiao	MOL000098	quercetin	NFE2L2
huajiao	MOL000098	quercetin	NQO1
huajiao	MOL000098	quercetin	PARP1
huajiao	MOL000098	quercetin	AHR
huajiao	MOL000098	quercetin	PSMD3
huajiao	MOL000098	quercetin	SLC2A4
huajiao	MOL000098	quercetin	COL3A1
huajiao	MOL000098	quercetin	CXCL11
huajiao	MOL000098	quercetin	CXCL2
huajiao	MOL000098	quercetin	DCAF5
huajiao	MOL000098	quercetin	NR1I3
huajiao	MOL000098	quercetin	CHEK2
huajiao	MOL000098	quercetin	INSR
huajiao	MOL000098	quercetin	CLDN4
huajiao	MOL000098	quercetin	PPARA
huajiao	MOL000098	quercetin	PPARD
huajiao	MOL000098	quercetin	HSF1
huajiao	MOL000098	quercetin	CXCL10
huajiao	MOL000098	quercetin	CHUK
huajiao	MOL000098	quercetin	SPP1
huajiao	MOL000098	quercetin	RUNX2
huajiao	MOL000098	quercetin	RASSF1
huajiao	MOL000098	quercetin	E2F1
huajiao	MOL000098	quercetin	E2F2
huajiao	MOL000098	quercetin	ACP3
huajiao	MOL000098	quercetin	CTSD
huajiao	MOL000098	quercetin	IGFBP3
huajiao	MOL000098	quercetin	IGF2
huajiao	MOL000098	quercetin	CD40LG
huajiao	MOL000098	quercetin	IRF1
huajiao	MOL000098	quercetin	ERBB3
huajiao	MOL000098	quercetin	PON1
huajiao	MOL000098	quercetin	DIO1
huajiao	MOL000098	quercetin	PCOLCE
huajiao	MOL000098	quercetin	NPEPPS
huajiao	MOL000098	quercetin	HK2
huajiao	MOL000098	quercetin	RASA1
huajiao	MOL000098	quercetin	GSTM1
huajiao	MOL000098	quercetin	GSTM2
huajiao			SERTAD1
huangbai	MOL001454	berberine	PTGS1
huangbai	MOL001454	berberine	KCNH2
huangbai	MOL001454	berberine	ESR1
huangbai	MOL001454	berberine	AR
huangbai	MOL001454	berberine	SCN5A
huangbai	MOL001454	berberine	F10
huangbai	MOL001454	berberine	PTGS2
huangbai	MOL001454	berberine	RXRA
huangbai	MOL001454	berberine	ADRB2
huangbai	MOL001454	berberine	HSP90AA1
huangbai	MOL001454	berberine	PRKACA
huangbai	MOL001454	berberine	PRSS1
huangbai	MOL001454	berberine	NCOA2
huangbai	MOL001454	berberine	PDE10A
huangbai	MOL001454	berberine	PCP4
huangbai	MOL001458	coptisine	NOS2
huangbai	MOL001458	coptisine	PTGS1
huangbai	MOL001458	coptisine	KCNH2
huangbai	MOL001458	coptisine	ESR1
huangbai	MOL001458	coptisine	AR
huangbai	MOL001458	coptisine	SCN5A
huangbai	MOL001458	coptisine	PTGS2
huangbai	MOL001458	coptisine	PRSS1
huangbai	MOL002641	Phellavin_qt	PTGS2
huangbai	MOL002641	Phellavin_qt	F7
huangbai	MOL002641	Phellavin_qt	HSP90AA1
huangbai	MOL002643	delta 7-stigmastenol	PGR
huangbai	MOL002644	Phellopterin	F2
huangbai	MOL002644	Phellopterin	CHRM1
huangbai	MOL002644	Phellopterin	SCN5A
huangbai	MOL002644	Phellopterin	PTGS2
huangbai	MOL002644	Phellopterin	RXRA
huangbai	MOL002644	Phellopterin	ADRA1B
huangbai	MOL002644	Phellopterin	PTPN1
huangbai	MOL002644	Phellopterin	ADRB2
huangbai	MOL002644	Phellopterin	DPP4
huangbai	MOL002644	Phellopterin	HSP90AA1
huangbai	MOL002644	Phellopterin	CHRNA7
huangbai	MOL002651	Dehydrotanshinone II A	DRD1
huangbai	MOL002651	Dehydrotanshinone II A	CHRM3
huangbai	MOL002651	Dehydrotanshinone II A	F2
huangbai	MOL002651	Dehydrotanshinone II A	CHRM1
huangbai	MOL002651	Dehydrotanshinone II A	ESR1
huangbai	MOL002651	Dehydrotanshinone II A	AR
huangbai	MOL002651	Dehydrotanshinone II A	SCN5A
huangbai	MOL002651	Dehydrotanshinone II A	PPARG
huangbai	MOL002651	Dehydrotanshinone II A	CHRM5
huangbai	MOL002651	Dehydrotanshinone II A	PTGS2
huangbai	MOL002651	Dehydrotanshinone II A	CHRM4
huangbai	MOL002651	Dehydrotanshinone II A	OPRD1
huangbai	MOL002651	Dehydrotanshinone II A	ACHE
huangbai	MOL002651	Dehydrotanshinone II A	ADRA1A
huangbai	MOL002651	Dehydrotanshinone II A	ADRB2
huangbai	MOL002651	Dehydrotanshinone II A	OPRM1
huangbai	MOL002651	Dehydrotanshinone II A	DPP4
huangbai	MOL002651	Dehydrotanshinone II A	CHRNA7
huangbai	MOL002651	Dehydrotanshinone II A	NCOA1
huangbai	MOL002662	rutaecarpine	PTGS1
huangbai	MOL002662	rutaecarpine	AR
huangbai	MOL002662	rutaecarpine	SCN5A
huangbai	MOL002662	rutaecarpine	F10
huangbai	MOL002662	rutaecarpine	PTGS2
huangbai	MOL002662	rutaecarpine	RXRA
huangbai	MOL002662	rutaecarpine	CHEK1
huangbai	MOL002662	rutaecarpine	PRKACA
huangbai	MOL002662	rutaecarpine	MMP2
huangbai	MOL002662	rutaecarpine	MMP9
huangbai	MOL002662	rutaecarpine	TNFAIP6
huangbai	MOL002662	rutaecarpine	CYP3A4
huangbai	MOL002662	rutaecarpine	SERTAD1
huangbai	MOL002662	rutaecarpine	IL4R
huangbai	MOL002662	rutaecarpine	CYP2B6
huangbai	MOL002663	Skimmianin	RXRA
huangbai	MOL002663	Skimmianin	HSP90AA1
huangbai	MOL002663	Skimmianin	PRKACA
huangbai	MOL002666	Chelerythrine	PTGS1
huangbai	MOL002666	Chelerythrine	KCNH2
huangbai	MOL002666	Chelerythrine	PTGS2
huangbai	MOL002666	Chelerythrine	RXRA
huangbai	MOL002666	Chelerythrine	PRKACA
huangbai	MOL002666	Chelerythrine	NCOA2
huangbai	MOL000449	Stigmasterol	PGR
huangbai	MOL000449	Stigmasterol	NR3C2
huangbai	MOL000449	Stigmasterol	NCOA2
huangbai	MOL000449	Stigmasterol	SERTAD1
huangbai	MOL000449	Stigmasterol	IGHG1
huangbai	MOL000449	Stigmasterol	RXRA
huangbai	MOL000449	Stigmasterol	NCOA1
huangbai	MOL000449	Stigmasterol	PTGS1
huangbai	MOL000449	Stigmasterol	PTGS2
huangbai	MOL000449	Stigmasterol	ADRA2A
huangbai	MOL000449	Stigmasterol	SLC6A2
huangbai	MOL000449	Stigmasterol	SLC6A3
huangbai	MOL000449	Stigmasterol	ADRB2
huangbai	MOL000449	Stigmasterol	AKR1B1
huangbai	MOL000449	Stigmasterol	PLAU
huangbai	MOL000449	Stigmasterol	LTA4H
huangbai	MOL000449	Stigmasterol	MAOB
huangbai	MOL000449	Stigmasterol	MAOA
huangbai	MOL000449	Stigmasterol	PRKACA
huangbai	MOL000449	Stigmasterol	CTRB1
huangbai	MOL000449	Stigmasterol	CHRM3
huangbai	MOL000449	Stigmasterol	CHRM1
huangbai	MOL000449	Stigmasterol	ADRB1
huangbai	MOL000449	Stigmasterol	SCN5A
huangbai	MOL000449	Stigmasterol	ADRA1A
huangbai	MOL000449	Stigmasterol	CHRM2
huangbai	MOL000449	Stigmasterol	ADRA1B
huangbai	MOL000449	Stigmasterol	CHRNA7
huangbai	MOL002668	Worenine	NOS2
huangbai	MOL002668	Worenine	PTGS1
huangbai	MOL002668	Worenine	ESR1
huangbai	MOL002668	Worenine	AR
huangbai	MOL002668	Worenine	PTGS2
huangbai	MOL002668	Worenine	CHEK1
huangbai	MOL002670	Cavidine	PTGS1
huangbai	MOL002670	Cavidine	CHRM3
huangbai	MOL002670	Cavidine	KCNH2
huangbai	MOL002670	Cavidine	CHRM1
huangbai	MOL002670	Cavidine	ADRB1
huangbai	MOL002670	Cavidine	SCN5A
huangbai	MOL002670	Cavidine	F10
huangbai	MOL002670	Cavidine	CHRM5
huangbai	MOL002670	Cavidine	PTGS2
huangbai	MOL002670	Cavidine	ADRA2C
huangbai	MOL002670	Cavidine	CHRM4
huangbai	MOL002670	Cavidine	RXRA
huangbai	MOL002670	Cavidine	OPRD1
huangbai	MOL002670	Cavidine	ADRA1B
huangbai	MOL002670	Cavidine	ADRB2
huangbai	MOL002670	Cavidine	ADRA1D
huangbai	MOL002670	Cavidine	TOP2A
huangbai	MOL002670	Cavidine	OPRM1
huangbai	MOL002670	Cavidine	HSP90AA1
huangbai	MOL002670	Cavidine	SERTAD1
huangbai	MOL002670	Cavidine	PCP4
huangbai	MOL002670	Cavidine	DRD1
huangbai	MOL002670	Cavidine	SLC6A4
huangbai	MOL002670	Cavidine	F7
huangbai	MOL002670	Cavidine	PDE10A
huangbai	MOL002672	Hericenone H	F2
huangbai	MOL000358	beta-sitosterol	PGR
huangbai	MOL000358	beta-sitosterol	NCOA2
huangbai	MOL000358	beta-sitosterol	PTGS1
huangbai	MOL000358	beta-sitosterol	PTGS2
huangbai	MOL000358	beta-sitosterol	HSP90AA1
huangbai	MOL000358	beta-sitosterol	KCNH2
huangbai	MOL000358	beta-sitosterol	PRKACA
huangbai	MOL000358	beta-sitosterol	DRD1
huangbai	MOL000358	beta-sitosterol	CHRM3
huangbai	MOL000358	beta-sitosterol	CHRM1
huangbai	MOL000358	beta-sitosterol	SCN5A
huangbai	MOL000358	beta-sitosterol	CHRM4
huangbai	MOL000358	beta-sitosterol	PDE3A
huangbai	MOL000358	beta-sitosterol	ADRA1A
huangbai	MOL000358	beta-sitosterol	CHRM2
huangbai	MOL000358	beta-sitosterol	ADRA1B
huangbai	MOL000358	beta-sitosterol	ADRB2
huangbai	MOL000358	beta-sitosterol	CHRNA2
huangbai	MOL000358	beta-sitosterol	SLC6A4
huangbai	MOL000358	beta-sitosterol	OPRM1
huangbai	MOL000358	beta-sitosterol	CHRNA7
huangbai	MOL000358	beta-sitosterol	BCL2
huangbai	MOL000358	beta-sitosterol	BAX
huangbai	MOL000358	beta-sitosterol	CASP9
huangbai	MOL000358	beta-sitosterol	JUN
huangbai	MOL000358	beta-sitosterol	CASP3
huangbai	MOL000358	beta-sitosterol	CASP8
huangbai	MOL000358	beta-sitosterol	PRKCA
huangbai	MOL000358	beta-sitosterol	PON1
huangbai	MOL000358	beta-sitosterol	MAP2
huangbai	MOL000622	Magnograndiolide	GRIA2
huangbai	MOL000785	palmatine	NOS2
huangbai	MOL000785	palmatine	PTGS1
huangbai	MOL000785	palmatine	KCNH2
huangbai	MOL000785	palmatine	ESR1
huangbai	MOL000785	palmatine	AR
huangbai	MOL000785	palmatine	SCN5A
huangbai	MOL000785	palmatine	PTGS2
huangbai	MOL000785	palmatine	RXRA
huangbai	MOL000785	palmatine	ADRB2
huangbai	MOL000785	palmatine	ESR2
huangbai	MOL000785	palmatine	HSP90AA1
huangbai	MOL000785	palmatine	PRSS1
huangbai	MOL000785	palmatine	NCOA2
huangbai	MOL000785	palmatine	PCP4
huangbai	MOL000785	palmatine	PRKACA
huangbai	MOL000785	palmatine	CDK2
huangbai	MOL000785	palmatine	F7
huangbai	MOL000787	Fumarine	PTGS1
huangbai	MOL000787	Fumarine	CHRM3
huangbai	MOL000787	Fumarine	KCNH2
huangbai	MOL000787	Fumarine	CHRM1
huangbai	MOL000787	Fumarine	SCN5A
huangbai	MOL000787	Fumarine	F10
huangbai	MOL000787	Fumarine	CHRM5
huangbai	MOL000787	Fumarine	PTGS2
huangbai	MOL000787	Fumarine	F7
huangbai	MOL000787	Fumarine	CHRM4
huangbai	MOL000787	Fumarine	OPRD1
huangbai	MOL000787	Fumarine	ADRA1B
huangbai	MOL000787	Fumarine	ADRB2
huangbai	MOL000787	Fumarine	ADRA1D
huangbai	MOL000787	Fumarine	OPRM1
huangbai	MOL000787	Fumarine	HSP90AA1
huangbai	MOL000787	Fumarine	PRKACA
huangbai	MOL000787	Fumarine	PCP4
huangbai	MOL000787	Fumarine	SLC6A4
huangbai	MOL000787	Fumarine	CACNA1S
huangbai	MOL000787	Fumarine	PDE3A
huangbai	MOL000787	Fumarine	SLC6A3
huangbai	MOL000787	Fumarine	PDE4D
huangbai	MOL000787	Fumarine	TOP2A
huangbai	MOL000787	Fumarine	DRD1
huangbai	MOL000787	Fumarine	KDR
huangbai	MOL000790	Isocorypalmine	PTGS1
huangbai	MOL000790	Isocorypalmine	DRD1
huangbai	MOL000790	Isocorypalmine	CHRM3
huangbai	MOL000790	Isocorypalmine	KCNH2
huangbai	MOL000790	Isocorypalmine	CHRM1
huangbai	MOL000790	Isocorypalmine	DRD5
huangbai	MOL000790	Isocorypalmine	SCN5A
huangbai	MOL000790	Isocorypalmine	F10
huangbai	MOL000790	Isocorypalmine	CHRM5
huangbai	MOL000790	Isocorypalmine	PTGS2
huangbai	MOL000790	Isocorypalmine	CA2
huangbai	MOL000790	Isocorypalmine	ADRA2C
huangbai	MOL000790	Isocorypalmine	CHRM4
huangbai	MOL000790	Isocorypalmine	RXRA
huangbai	MOL000790	Isocorypalmine	OPRD1
huangbai	MOL000790	Isocorypalmine	SLC6A2
huangbai	MOL000790	Isocorypalmine	ADRA1A
huangbai	MOL000790	Isocorypalmine	CHRM2
huangbai	MOL000790	Isocorypalmine	ADRA2B
huangbai	MOL000790	Isocorypalmine	ADRA1B
huangbai	MOL000790	Isocorypalmine	DRD3
huangbai	MOL000790	Isocorypalmine	SLC6A3
huangbai	MOL000790	Isocorypalmine	ADRB2
huangbai	MOL000790	Isocorypalmine	ADRA1D
huangbai	MOL000790	Isocorypalmine	SLC6A4
huangbai	MOL000790	Isocorypalmine	OPRM1
huangbai	MOL000790	Isocorypalmine	HSP90AA1
huangbai	MOL000790	Isocorypalmine	PRKACA
huangbai	MOL000790	Isocorypalmine	SERTAD1
huangbai	MOL000790	Isocorypalmine	IGHG1
huangbai	MOL000790	Isocorypalmine	NCOA1
huangbai	MOL000790	Isocorypalmine	PCP4
huangbai	MOL000098	quercetin	PTGS1
huangbai	MOL000098	quercetin	AR
huangbai	MOL000098	quercetin	PPARG
huangbai	MOL000098	quercetin	PTGS2
huangbai	MOL000098	quercetin	HSP90AA1
huangbai	MOL000098	quercetin	NCOA2
huangbai	MOL000098	quercetin	DPP4
huangbai	MOL000098	quercetin	AKR1B1
huangbai	MOL000098	quercetin	PRSS1
huangbai	MOL000098	quercetin	TOP2A
huangbai	MOL000098	quercetin	F2
huangbai	MOL000098	quercetin	KCNH2
huangbai	MOL000098	quercetin	SCN5A
huangbai	MOL000098	quercetin	F10
huangbai	MOL000098	quercetin	ADRB2
huangbai	MOL000098	quercetin	MMP3
huangbai	MOL000098	quercetin	PRKACA
huangbai	MOL000098	quercetin	F7
huangbai	MOL000098	quercetin	RXRA
huangbai	MOL000098	quercetin	ACHE
huangbai	MOL000098	quercetin	MAOB
huangbai	MOL000098	quercetin	RELA
huangbai	MOL000098	quercetin	EGFR
huangbai	MOL000098	quercetin	AKT1
huangbai	MOL000098	quercetin	SERTAD1
huangbai	MOL000098	quercetin	CCND1
huangbai	MOL000098	quercetin	BCL2
huangbai	MOL000098	quercetin	BCL2L1
huangbai	MOL000098	quercetin	FOS
huangbai	MOL000098	quercetin	CDKN1A
huangbai	MOL000098	quercetin	EIF6
huangbai	MOL000098	quercetin	BAX
huangbai	MOL000098	quercetin	CASP9
huangbai	MOL000098	quercetin	PLAU
huangbai	MOL000098	quercetin	MMP2
huangbai	MOL000098	quercetin	MMP9
huangbai	MOL000098	quercetin	MAPK1
huangbai	MOL000098	quercetin	IL10RB
huangbai	MOL000098	quercetin	RB1
huangbai	MOL000098	quercetin	TNFAIP6
huangbai	MOL000098	quercetin	JUN
huangbai	MOL000098	quercetin	IL6ST
huangbai	MOL000098	quercetin	AHSA1
huangbai	MOL000098	quercetin	CASP3
huangbai	MOL000098	quercetin	TP53
huangbai	MOL000098	quercetin	ELK1
huangbai	MOL000098	quercetin	NFKBIA
huangbai	MOL000098	quercetin	ODC1
huangbai	MOL000098	quercetin	CASP8
huangbai	MOL000098	quercetin	TOP1
huangbai	MOL000098	quercetin	RAF1
huangbai	MOL000098	quercetin	SOD1
huangbai	MOL000098	quercetin	PRKCA
huangbai	MOL000098	quercetin	MMP1
huangbai	MOL000098	quercetin	HIF1A
huangbai	MOL000098	quercetin	STAT1
huangbai	MOL000098	quercetin	RUNX1T1
huangbai	MOL000098	quercetin	CDK1
huangbai	MOL000098	quercetin	HSPA5
huangbai	MOL000098	quercetin	ERBB2
huangbai	MOL000098	quercetin	PPARG
huangbai	MOL000098	quercetin	ACACA
huangbai	MOL000098	quercetin	HMOX1
huangbai	MOL000098	quercetin	CYP3A4
huangbai	MOL000098	quercetin	CAV1
huangbai	MOL000098	quercetin	MYC
huangbai	MOL000098	quercetin	F3
huangbai	MOL000098	quercetin	GJA1
huangbai	MOL000098	quercetin	CYP1A1
huangbai	MOL000098	quercetin	ICAM1
huangbai	MOL000098	quercetin	IL1B
huangbai	MOL000098	quercetin	CCL2
huangbai	MOL000098	quercetin	SELE
huangbai	MOL000098	quercetin	VCAM1
huangbai	MOL000098	quercetin	CXCL8
huangbai	MOL000098	quercetin	PRKCB
huangbai	MOL000098	quercetin	BIRC5
huangbai	MOL000098	quercetin	DUOX2
huangbai	MOL000098	quercetin	NOS3
huangbai	MOL000098	quercetin	HSPB1
huangbai	MOL000098	quercetin	IL2
huangbai	MOL000098	quercetin	NR1I2
huangbai	MOL000098	quercetin	CYP1B1
huangbai	MOL000098	quercetin	CCNB1
huangbai	MOL000098	quercetin	PLAT
huangbai	MOL000098	quercetin	THBD
huangbai	MOL000098	quercetin	SERPINE1
huangbai	MOL000098	quercetin	IFNG
huangbai	MOL000098	quercetin	ALOX5
huangbai	MOL000098	quercetin	IL1A
huangbai	MOL000098	quercetin	MPO
huangbai	MOL000098	quercetin	TOP2A
huangbai	MOL000098	quercetin	NCF1
huangbai	MOL000098	quercetin	ABCG2
huangbai	MOL000098	quercetin	HAS2
huangbai	MOL000098	quercetin	NFE2L2
huangbai	MOL000098	quercetin	NQO1
huangbai	MOL000098	quercetin	PARP1
huangbai	MOL000098	quercetin	AHR
huangbai	MOL000098	quercetin	PSMD3
huangbai	MOL000098	quercetin	SLC2A4
huangbai	MOL000098	quercetin	COL3A1
huangbai	MOL000098	quercetin	CXCL11
huangbai	MOL000098	quercetin	CXCL2
huangbai	MOL000098	quercetin	DCAF5
huangbai	MOL000098	quercetin	NR1I3
huangbai	MOL000098	quercetin	CHEK2
huangbai	MOL000098	quercetin	INSR
huangbai	MOL000098	quercetin	CLDN4
huangbai	MOL000098	quercetin	PPARA
huangbai	MOL000098	quercetin	PPARD
huangbai	MOL000098	quercetin	HSF1
huangbai	MOL000098	quercetin	CXCL10
huangbai	MOL000098	quercetin	CHUK
huangbai	MOL000098	quercetin	SPP1
huangbai	MOL000098	quercetin	RUNX2
huangbai	MOL000098	quercetin	RASSF1
huangbai	MOL000098	quercetin	E2F1
huangbai	MOL000098	quercetin	E2F2
huangbai	MOL000098	quercetin	ACP3
huangbai	MOL000098	quercetin	CTSD
huangbai	MOL000098	quercetin	IGFBP3
huangbai	MOL000098	quercetin	IGF2
huangbai	MOL000098	quercetin	CD40LG
huangbai	MOL000098	quercetin	IRF1
huangbai	MOL000098	quercetin	ERBB3
huangbai	MOL000098	quercetin	PON1
huangbai	MOL000098	quercetin	DIO1
huangbai	MOL000098	quercetin	PCOLCE
huangbai	MOL000098	quercetin	NPEPPS
huangbai	MOL000098	quercetin	HK2
huangbai	MOL000098	quercetin	RASA1
huangbai	MOL000098	quercetin	GSTM1
huangbai	MOL000098	quercetin	GSTM2
huangbai	MOL001131	phellamurin_qt	ESR1
huangbai	MOL001131	phellamurin_qt	F10
huangbai	MOL001131	phellamurin_qt	PTGS2
huangbai	MOL001131	phellamurin_qt	F7
huangbai	MOL001131	phellamurin_qt	PDE3A
huangbai	MOL001131	phellamurin_qt	TOP2A
huangbai	MOL001131	phellamurin_qt	HSP90AA1
huangbai	MOL001131	phellamurin_qt	NCOA2
huangbai	MOL001131	phellamurin_qt	PCP4
huangbai	MOL001131	phellamurin_qt	NR3C1
huangbai	MOL001455	(S)-Canadine	PTGS1
huangbai	MOL001455	(S)-Canadine	DRD1
huangbai	MOL001455	(S)-Canadine	CHRM3
huangbai	MOL001455	(S)-Canadine	KCNH2
huangbai	MOL001455	(S)-Canadine	CHRM1
huangbai	MOL001455	(S)-Canadine	SCN5A
huangbai	MOL001455	(S)-Canadine	F10
huangbai	MOL001455	(S)-Canadine	CHRM5
huangbai	MOL001455	(S)-Canadine	PTGS2
huangbai	MOL001455	(S)-Canadine	F7
huangbai	MOL001455	(S)-Canadine	ADRA2C
huangbai	MOL001455	(S)-Canadine	CHRM4
huangbai	MOL001455	(S)-Canadine	RXRA
huangbai	MOL001455	(S)-Canadine	OPRD1
huangbai	MOL001455	(S)-Canadine	ADRA1A
huangbai	MOL001455	(S)-Canadine	CHRM2
huangbai	MOL001455	(S)-Canadine	ADRA2B
huangbai	MOL001455	(S)-Canadine	ADRA1B
huangbai	MOL001455	(S)-Canadine	DRD3
huangbai	MOL001455	(S)-Canadine	SLC6A3
huangbai	MOL001455	(S)-Canadine	ADRB2
huangbai	MOL001455	(S)-Canadine	ADRA1D
huangbai	MOL001455	(S)-Canadine	SLC6A4
huangbai	MOL001455	(S)-Canadine	OPRM1
huangbai	MOL001455	(S)-Canadine	HSP90AA1
huangbai	MOL001455	(S)-Canadine	PRKACA
huangbai	MOL001455	(S)-Canadine	PCP4
huangbai	MOL001455	(S)-Canadine	DRD5
huangbai	MOL001455	(S)-Canadine	SERTAD1
huangbai	MOL001771	poriferast-5-en-3beta-ol	PGR
huangbai	MOL001771	poriferast-5-en-3beta-ol	NCOA2
huangbai	MOL002894	berberrubine	NOS2
huangbai	MOL002894	berberrubine	PTGS1
huangbai	MOL002894	berberrubine	KCNH2
huangbai	MOL002894	berberrubine	ESR1
huangbai	MOL002894	berberrubine	AR
huangbai	MOL002894	berberrubine	SCN5A
huangbai	MOL002894	berberrubine	PTGS2
huangbai	MOL002894	berberrubine	RXRA
huangbai	MOL002894	berberrubine	PRKACA
huangbai	MOL002894	berberrubine	PRSS1
huangbai	MOL002894	berberrubine	NCOA2
huangbai	MOL002894	berberrubine	PCP4
huangbai	MOL005438	campesterol	PGR
huangbai	MOL006422	thalifendine	NOS2
huangbai	MOL006422	thalifendine	PTGS1
huangbai	MOL006422	thalifendine	KCNH2
huangbai	MOL006422	thalifendine	ESR1
huangbai	MOL006422	thalifendine	AR
huangbai	MOL006422	thalifendine	SCN5A
huangbai	MOL006422	thalifendine	PTGS2
huangbai	MOL006422	thalifendine	RXRA
huangbai	MOL006422	thalifendine	PRKACA
huangbai	MOL006422	thalifendine	PRSS1
huangbai	MOL006422	thalifendine	NCOA2
huangbai	MOL006422	thalifendine	PCP4
huangbai	MOL006422	thalifendine	HSP90AA1
huanglian	MOL001454	berberine	PTGS1
huanglian	MOL001454	berberine	KCNH2
huanglian	MOL001454	berberine	ESR1
huanglian	MOL001454	berberine	AR
huanglian	MOL001454	berberine	SCN5A
huanglian	MOL001454	berberine	F10
huanglian	MOL001454	berberine	PTGS2
huanglian	MOL001454	berberine	RXRA
huanglian	MOL001454	berberine	ADRB2
huanglian	MOL001454	berberine	HSP90AA1
huanglian	MOL001454	berberine	PRKACA
huanglian	MOL001454	berberine	PRSS1
huanglian	MOL001454	berberine	NCOA2
huanglian	MOL001454	berberine	PDE10A
huanglian	MOL001454	berberine	PCP4
huanglian	MOL002894	berberrubine	NOS2
huanglian	MOL002894	berberrubine	PTGS1
huanglian	MOL002894	berberrubine	KCNH2
huanglian	MOL002894	berberrubine	ESR1
huanglian	MOL002894	berberrubine	AR
huanglian	MOL002894	berberrubine	SCN5A
huanglian	MOL002894	berberrubine	PTGS2
huanglian	MOL002894	berberrubine	RXRA
huanglian	MOL002894	berberrubine	PRKACA
huanglian	MOL002894	berberrubine	PRSS1
huanglian	MOL002894	berberrubine	NCOA2
huanglian	MOL002894	berberrubine	PCP4
huanglian	MOL002897	epiberberine	NOS2
huanglian	MOL002897	epiberberine	KCNH2
huanglian	MOL002897	epiberberine	ESR1
huanglian	MOL002897	epiberberine	AR
huanglian	MOL002897	epiberberine	PTGS2
huanglian	MOL002897	epiberberine	RXRA
huanglian	MOL002897	epiberberine	PRKACA
huanglian	MOL002897	epiberberine	PRSS1
huanglian	MOL002897	epiberberine	NCOA2
huanglian	MOL002897	epiberberine	PDE10A
huanglian	MOL002903	(R)-Canadine	PTGS1
huanglian	MOL002903	(R)-Canadine	CHRM3
huanglian	MOL002903	(R)-Canadine	KCNH2
huanglian	MOL002903	(R)-Canadine	CHRM1
huanglian	MOL002903	(R)-Canadine	SCN5A
huanglian	MOL002903	(R)-Canadine	F10
huanglian	MOL002903	(R)-Canadine	CHRM5
huanglian	MOL002903	(R)-Canadine	PTGS2
huanglian	MOL002903	(R)-Canadine	ADRA2C
huanglian	MOL002903	(R)-Canadine	CHRM4
huanglian	MOL002903	(R)-Canadine	OPRD1
huanglian	MOL002903	(R)-Canadine	ADRA1B
huanglian	MOL002903	(R)-Canadine	SLC6A3
huanglian	MOL002903	(R)-Canadine	ADRB2
huanglian	MOL002903	(R)-Canadine	ADRA1D
huanglian	MOL002903	(R)-Canadine	SLC6A4
huanglian	MOL002903	(R)-Canadine	OPRM1
huanglian	MOL002903	(R)-Canadine	HSP90AA1
huanglian	MOL002903	(R)-Canadine	PRKACA
huanglian	MOL002903	(R)-Canadine	PDE10A
huanglian	MOL002903	(R)-Canadine	PCP4
huanglian	MOL002903	(R)-Canadine	DRD1
huanglian	MOL002903	(R)-Canadine	DRD5
huanglian	MOL002903	(R)-Canadine	RXRA
huanglian	MOL002903	(R)-Canadine	SLC6A2
huanglian	MOL002903	(R)-Canadine	ADRA1A
huanglian	MOL002903	(R)-Canadine	CHRM2
huanglian	MOL002904	Berlambine	NOS2
huanglian	MOL002904	Berlambine	PTGS1
huanglian	MOL002904	Berlambine	CHRM3
huanglian	MOL002904	Berlambine	KCNH2
huanglian	MOL002904	Berlambine	AR
huanglian	MOL002904	Berlambine	SCN5A
huanglian	MOL002904	Berlambine	F10
huanglian	MOL002904	Berlambine	PTGS2
huanglian	MOL002904	Berlambine	F7
huanglian	MOL002904	Berlambine	RXRA
huanglian	MOL002904	Berlambine	ADRA1B
huanglian	MOL002904	Berlambine	ADRB2
huanglian	MOL002904	Berlambine	ADRA1D
huanglian	MOL002904	Berlambine	HSP90AA1
huanglian	MOL002904	Berlambine	PRKACA
huanglian	MOL002904	Berlambine	PRSS1
huanglian	MOL002904	Berlambine	NCOA2
huanglian	MOL002904	Berlambine	PCP4
huanglian	MOL002907	Corchoroside A_qt	NR3C2
huanglian	MOL002907	Corchoroside A_qt	NCOA2
huanglian	MOL000622	Magnograndiolide	GRIA2
huanglian	MOL000785	palmatine	NOS2
huanglian	MOL000785	palmatine	PTGS1
huanglian	MOL000785	palmatine	KCNH2
huanglian	MOL000785	palmatine	ESR1
huanglian	MOL000785	palmatine	AR
huanglian	MOL000785	palmatine	SCN5A
huanglian	MOL000785	palmatine	PTGS2
huanglian	MOL000785	palmatine	RXRA
huanglian	MOL000785	palmatine	ADRB2
huanglian	MOL000785	palmatine	ESR2
huanglian	MOL000785	palmatine	HSP90AA1
huanglian	MOL000785	palmatine	PRSS1
huanglian	MOL000785	palmatine	NCOA2
huanglian	MOL000785	palmatine	PCP4
huanglian	MOL000785	palmatine	PRKACA
huanglian	MOL000785	palmatine	CDK2
huanglian	MOL000785	palmatine	F7
huanglian	MOL000098	quercetin	PTGS1
huanglian	MOL000098	quercetin	AR
huanglian	MOL000098	quercetin	PPARG
huanglian	MOL000098	quercetin	PTGS2
huanglian	MOL000098	quercetin	HSP90AA1
huanglian	MOL000098	quercetin	NCOA2
huanglian	MOL000098	quercetin	DPP4
huanglian	MOL000098	quercetin	AKR1B1
huanglian	MOL000098	quercetin	PRSS1
huanglian	MOL000098	quercetin	TOP2A
huanglian	MOL000098	quercetin	F2
huanglian	MOL000098	quercetin	KCNH2
huanglian	MOL000098	quercetin	SCN5A
huanglian	MOL000098	quercetin	F10
huanglian	MOL000098	quercetin	ADRB2
huanglian	MOL000098	quercetin	MMP3
huanglian	MOL000098	quercetin	PRKACA
huanglian	MOL000098	quercetin	F7
huanglian	MOL000098	quercetin	RXRA
huanglian	MOL000098	quercetin	ACHE
huanglian	MOL000098	quercetin	MAOB
huanglian	MOL000098	quercetin	RELA
huanglian	MOL000098	quercetin	EGFR
huanglian	MOL000098	quercetin	AKT1
huanglian	MOL000098	quercetin	SERTAD1
huanglian	MOL000098	quercetin	CCND1
huanglian	MOL000098	quercetin	BCL2
huanglian	MOL000098	quercetin	BCL2L1
huanglian	MOL000098	quercetin	FOS
huanglian	MOL000098	quercetin	CDKN1A
huanglian	MOL000098	quercetin	EIF6
huanglian	MOL000098	quercetin	BAX
huanglian	MOL000098	quercetin	CASP9
huanglian	MOL000098	quercetin	PLAU
huanglian	MOL000098	quercetin	MMP2
huanglian	MOL000098	quercetin	MMP9
huanglian	MOL000098	quercetin	MAPK1
huanglian	MOL000098	quercetin	IL10RB
huanglian	MOL000098	quercetin	RB1
huanglian	MOL000098	quercetin	TNFAIP6
huanglian	MOL000098	quercetin	JUN
huanglian	MOL000098	quercetin	IL6ST
huanglian	MOL000098	quercetin	AHSA1
huanglian	MOL000098	quercetin	CASP3
huanglian	MOL000098	quercetin	TP53
huanglian	MOL000098	quercetin	ELK1
huanglian	MOL000098	quercetin	NFKBIA
huanglian	MOL000098	quercetin	ODC1
huanglian	MOL000098	quercetin	CASP8
huanglian	MOL000098	quercetin	TOP1
huanglian	MOL000098	quercetin	RAF1
huanglian	MOL000098	quercetin	SOD1
huanglian	MOL000098	quercetin	PRKCA
huanglian	MOL000098	quercetin	MMP1
huanglian	MOL000098	quercetin	HIF1A
huanglian	MOL000098	quercetin	STAT1
huanglian	MOL000098	quercetin	RUNX1T1
huanglian	MOL000098	quercetin	CDK1
huanglian	MOL000098	quercetin	HSPA5
huanglian	MOL000098	quercetin	ERBB2
huanglian	MOL000098	quercetin	PPARG
huanglian	MOL000098	quercetin	ACACA
huanglian	MOL000098	quercetin	HMOX1
huanglian	MOL000098	quercetin	CYP3A4
huanglian	MOL000098	quercetin	CAV1
huanglian	MOL000098	quercetin	MYC
huanglian	MOL000098	quercetin	F3
huanglian	MOL000098	quercetin	GJA1
huanglian	MOL000098	quercetin	CYP1A1
huanglian	MOL000098	quercetin	ICAM1
huanglian	MOL000098	quercetin	IL1B
huanglian	MOL000098	quercetin	CCL2
huanglian	MOL000098	quercetin	SELE
huanglian	MOL000098	quercetin	VCAM1
huanglian	MOL000098	quercetin	CXCL8
huanglian	MOL000098	quercetin	PRKCB
huanglian	MOL000098	quercetin	BIRC5
huanglian	MOL000098	quercetin	DUOX2
huanglian	MOL000098	quercetin	NOS3
huanglian	MOL000098	quercetin	HSPB1
huanglian	MOL000098	quercetin	IL2
huanglian	MOL000098	quercetin	NR1I2
huanglian	MOL000098	quercetin	CYP1B1
huanglian	MOL000098	quercetin	CCNB1
huanglian	MOL000098	quercetin	PLAT
huanglian	MOL000098	quercetin	THBD
huanglian	MOL000098	quercetin	SERPINE1
huanglian	MOL000098	quercetin	IFNG
huanglian	MOL000098	quercetin	ALOX5
huanglian	MOL000098	quercetin	IL1A
huanglian	MOL000098	quercetin	MPO
huanglian	MOL000098	quercetin	TOP2A
huanglian	MOL000098	quercetin	NCF1
huanglian	MOL000098	quercetin	ABCG2
huanglian	MOL000098	quercetin	HAS2
huanglian	MOL000098	quercetin	NFE2L2
huanglian	MOL000098	quercetin	NQO1
huanglian	MOL000098	quercetin	PARP1
huanglian	MOL000098	quercetin	AHR
huanglian	MOL000098	quercetin	PSMD3
huanglian	MOL000098	quercetin	SLC2A4
huanglian	MOL000098	quercetin	COL3A1
huanglian	MOL000098	quercetin	CXCL11
huanglian	MOL000098	quercetin	CXCL2
huanglian	MOL000098	quercetin	DCAF5
huanglian	MOL000098	quercetin	NR1I3
huanglian	MOL000098	quercetin	CHEK2
huanglian	MOL000098	quercetin	INSR
huanglian	MOL000098	quercetin	CLDN4
huanglian	MOL000098	quercetin	PPARA
huanglian	MOL000098	quercetin	PPARD
huanglian	MOL000098	quercetin	HSF1
huanglian	MOL000098	quercetin	CXCL10
huanglian	MOL000098	quercetin	CHUK
huanglian	MOL000098	quercetin	SPP1
huanglian	MOL000098	quercetin	RUNX2
huanglian	MOL000098	quercetin	RASSF1
huanglian	MOL000098	quercetin	E2F1
huanglian	MOL000098	quercetin	E2F2
huanglian	MOL000098	quercetin	ACP3
huanglian	MOL000098	quercetin	CTSD
huanglian	MOL000098	quercetin	IGFBP3
huanglian	MOL000098	quercetin	IGF2
huanglian	MOL000098	quercetin	CD40LG
huanglian	MOL000098	quercetin	IRF1
huanglian	MOL000098	quercetin	ERBB3
huanglian	MOL000098	quercetin	PON1
huanglian	MOL000098	quercetin	DIO1
huanglian	MOL000098	quercetin	PCOLCE
huanglian	MOL000098	quercetin	NPEPPS
huanglian	MOL000098	quercetin	HK2
huanglian	MOL000098	quercetin	RASA1
huanglian	MOL000098	quercetin	GSTM1
huanglian	MOL000098	quercetin	GSTM2
huanglian	MOL001458	coptisine	NOS2
huanglian	MOL001458	coptisine	PTGS1
huanglian	MOL001458	coptisine	KCNH2
huanglian	MOL001458	coptisine	ESR1
huanglian	MOL001458	coptisine	AR
huanglian	MOL001458	coptisine	SCN5A
huanglian	MOL001458	coptisine	PTGS2
huanglian	MOL001458	coptisine	PRSS1
huanglian	MOL002668	Worenine	NOS2
huanglian	MOL002668	Worenine	PTGS1
huanglian	MOL002668	Worenine	ESR1
huanglian	MOL002668	Worenine	AR
huanglian	MOL002668	Worenine	PTGS2
huanglian	MOL002668	Worenine	CHEK1
rensen	MOL002879	Diop	SCN5A
rensen	MOL002879	Diop	ADRB2
rensen	MOL002879	Diop	CHRM3
rensen	MOL000449	Stigmasterol	PGR
rensen	MOL000449	Stigmasterol	NR3C2
rensen	MOL000449	Stigmasterol	NCOA2
rensen	MOL000449	Stigmasterol	SERTAD1
rensen	MOL000449	Stigmasterol	IGHG1
rensen	MOL000449	Stigmasterol	RXRA
rensen	MOL000449	Stigmasterol	NCOA1
rensen	MOL000449	Stigmasterol	PTGS1
rensen	MOL000449	Stigmasterol	PTGS2
rensen	MOL000449	Stigmasterol	ADRA2A
rensen	MOL000449	Stigmasterol	SLC6A2
rensen	MOL000449	Stigmasterol	SLC6A3
rensen	MOL000449	Stigmasterol	ADRB2
rensen	MOL000449	Stigmasterol	AKR1B1
rensen	MOL000449	Stigmasterol	PLAU
rensen	MOL000449	Stigmasterol	LTA4H
rensen	MOL000449	Stigmasterol	MAOB
rensen	MOL000449	Stigmasterol	MAOA
rensen	MOL000449	Stigmasterol	PRKACA
rensen	MOL000449	Stigmasterol	CTRB1
rensen	MOL000449	Stigmasterol	CHRM3
rensen	MOL000449	Stigmasterol	CHRM1
rensen	MOL000449	Stigmasterol	ADRB1
rensen	MOL000449	Stigmasterol	SCN5A
rensen	MOL000449	Stigmasterol	ADRA1A
rensen	MOL000449	Stigmasterol	CHRM2
rensen	MOL000449	Stigmasterol	ADRA1B
rensen	MOL000449	Stigmasterol	CHRNA7
rensen	MOL000358	beta-sitosterol	PGR
rensen	MOL000358	beta-sitosterol	NCOA2
rensen	MOL000358	beta-sitosterol	PTGS1
rensen	MOL000358	beta-sitosterol	PTGS2
rensen	MOL000358	beta-sitosterol	HSP90AA1
rensen	MOL000358	beta-sitosterol	KCNH2
rensen	MOL000358	beta-sitosterol	PRKACA
rensen	MOL000358	beta-sitosterol	DRD1
rensen	MOL000358	beta-sitosterol	CHRM3
rensen	MOL000358	beta-sitosterol	CHRM1
rensen	MOL000358	beta-sitosterol	SCN5A
rensen	MOL000358	beta-sitosterol	CHRM4
rensen	MOL000358	beta-sitosterol	PDE3A
rensen	MOL000358	beta-sitosterol	ADRA1A
rensen	MOL000358	beta-sitosterol	CHRM2
rensen	MOL000358	beta-sitosterol	ADRA1B
rensen	MOL000358	beta-sitosterol	ADRB2
rensen	MOL000358	beta-sitosterol	CHRNA2
rensen	MOL000358	beta-sitosterol	SLC6A4
rensen	MOL000358	beta-sitosterol	OPRM1
rensen	MOL000358	beta-sitosterol	CHRNA7
rensen	MOL000358	beta-sitosterol	BCL2
rensen	MOL000358	beta-sitosterol	BAX
rensen	MOL000358	beta-sitosterol	CASP9
rensen	MOL000358	beta-sitosterol	JUN
rensen	MOL000358	beta-sitosterol	CASP3
rensen	MOL000358	beta-sitosterol	CASP8
rensen	MOL000358	beta-sitosterol	PRKCA
rensen	MOL000358	beta-sitosterol	PON1
rensen	MOL000358	beta-sitosterol	MAP2
rensen	MOL003648	Inermin	PTGS1
rensen	MOL003648	Inermin	CHRM3
rensen	MOL003648	Inermin	SCN5A
rensen	MOL003648	Inermin	PTGS2
rensen	MOL003648	Inermin	RXRA
rensen	MOL003648	Inermin	ADRA1B
rensen	MOL003648	Inermin	ADRB2
rensen	MOL003648	Inermin	ADRA1D
rensen	MOL003648	Inermin	SLC6A4
rensen	MOL003648	Inermin	HSP90AA1
rensen	MOL003648	Inermin	CHRNA7
rensen	MOL003648	Inermin	PRKACA
rensen	MOL003648	Inermin	IGHG1
rensen	MOL003648	Inermin	PRSS1
rensen	MOL003648	Inermin	NCOA1
rensen	MOL003648	Inermin	PCP4
rensen	MOL000422	kaempferol	NOS2
rensen	MOL000422	kaempferol	PTGS1
rensen	MOL000422	kaempferol	AR
rensen	MOL000422	kaempferol	PPARG
rensen	MOL000422	kaempferol	PTGS2
rensen	MOL000422	kaempferol	HSP90AA1
rensen	MOL000422	kaempferol	PRKACA
rensen	MOL000422	kaempferol	NCOA2
rensen	MOL000422	kaempferol	DPP4
rensen	MOL000422	kaempferol	PRSS1
rensen	MOL000422	kaempferol	PGR
rensen	MOL000422	kaempferol	F2
rensen	MOL000422	kaempferol	CHRM1
rensen	MOL000422	kaempferol	ACHE
rensen	MOL000422	kaempferol	SLC6A2
rensen	MOL000422	kaempferol	CHRM2
rensen	MOL000422	kaempferol	ADRA1B
rensen	MOL000422	kaempferol	TOP2A
rensen	MOL000422	kaempferol	F7
rensen	MOL000422	kaempferol	PCP4
rensen	MOL000422	kaempferol	RELA
rensen	MOL000422	kaempferol	IKBKB
rensen	MOL000422	kaempferol	AKT1
rensen	MOL000422	kaempferol	BCL2
rensen	MOL000422	kaempferol	BAX
rensen	MOL000422	kaempferol	TNFAIP6
rensen	MOL000422	kaempferol	JUN
rensen	MOL000422	kaempferol	AHSA1
rensen	MOL000422	kaempferol	CASP3
rensen	MOL000422	kaempferol	MAPK8
rensen	MOL000422	kaempferol	MMP1
rensen	MOL000422	kaempferol	STAT1
rensen	MOL000422	kaempferol	CDK1
rensen	MOL000422	kaempferol	PPARG
rensen	MOL000422	kaempferol	HMOX1
rensen	MOL000422	kaempferol	CYP3A4
rensen	MOL000422	kaempferol	SERTAD1
rensen	MOL000422	kaempferol	CYP1A1
rensen	MOL000422	kaempferol	ICAM1
rensen	MOL000422	kaempferol	SELE
rensen	MOL000422	kaempferol	VCAM1
rensen	MOL000422	kaempferol	NR1I2
rensen	MOL000422	kaempferol	CYP1B1
rensen	MOL000422	kaempferol	ALOX5
rensen	MOL000422	kaempferol	HAS2
rensen	MOL000422	kaempferol	AHR
rensen	MOL000422	kaempferol	PSMD3
rensen	MOL000422	kaempferol	SLC2A4
rensen	MOL000422	kaempferol	NR1I3
rensen	MOL000422	kaempferol	INSR
rensen	MOL000422	kaempferol	DIO1
rensen	MOL000422	kaempferol	PPP3CA
rensen	MOL000422	kaempferol	GSTM1
rensen	MOL000422	kaempferol	GSTM2
rensen	MOL000422	kaempferol	AKR1C3
rensen	MOL000422	kaempferol	SLPI
rensen	MOL005308	Aposiopolamine	CHRM3
rensen	MOL005308	Aposiopolamine	CHRM1
rensen	MOL005308	Aposiopolamine	SLC6A2
rensen	MOL005308	Aposiopolamine	SLC6A3
rensen	MOL005308	Aposiopolamine	ADRB2
rensen	MOL005308	Aposiopolamine	SLC6A4
rensen	MOL005308	Aposiopolamine	DPP4
rensen	MOL005317	Deoxyharringtonine	AR
rensen	MOL005317	Deoxyharringtonine	NR3C2
rensen	MOL005318	Dianthramine	PTGS1
rensen	MOL005318	Dianthramine	PTGS2
rensen	MOL005318	Dianthramine	HSP90AA1
rensen	MOL005320	arachidonate	PTGS1
rensen	MOL005320	arachidonate	PTGS2
rensen	MOL005320	arachidonate	RXRG
rensen	MOL005320	arachidonate	NCOA2
rensen	MOL005321	Frutinone A	PTGS1
rensen	MOL005321	Frutinone A	F2
rensen	MOL005321	Frutinone A	AR
rensen	MOL005321	Frutinone A	SCN5A
rensen	MOL005321	Frutinone A	PPARG
rensen	MOL005321	Frutinone A	PTGS2
rensen	MOL005321	Frutinone A	RXRA
rensen	MOL005321	Frutinone A	PDE3A
rensen	MOL005321	Frutinone A	ADRB2
rensen	MOL005321	Frutinone A	DPP4
rensen	MOL005321	Frutinone A	HSP90AA1
rensen	MOL005321	Frutinone A	CHRNA7
rensen	MOL005321	Frutinone A	PRKACA
rensen	MOL005321	Frutinone A	ACHE
rensen	MOL005344	ginsenoside rh2	BAX
rensen	MOL005344	ginsenoside rh2	TNFAIP6
rensen	MOL005344	ginsenoside rh2	CASP3
rensen	MOL005344	ginsenoside rh2	PTGS2
rensen	MOL005344	ginsenoside rh2	NFKBIA
rensen	MOL005344	ginsenoside rh2	IL1B
rensen	MOL005344	ginsenoside rh2	CASP1
rensen	MOL005344	ginsenoside rh2	IFNG
rensen	MOL005344	ginsenoside rh2	ADCYAP1
rensen	MOL005344	ginsenoside rh2	PSMG1
rensen	MOL005344	ginsenoside rh2	MAP2K4
rensen	MOL005344	ginsenoside rh2	SLC2A4
rensen	MOL005348	Ginsenoside-Rh4_qt	NR3C2
rensen	MOL005348	Ginsenoside-Rh4_qt	NCOA2
rensen	MOL005356	Girinimbin	PTGS1
rensen	MOL005356	Girinimbin	SCN5A
rensen	MOL005356	Girinimbin	PTGS2
rensen	MOL005356	Girinimbin	RXRA
rensen	MOL005356	Girinimbin	ADRB2
rensen	MOL005356	Girinimbin	CHRNA7
rensen	MOL005356	Girinimbin	PRKACA
rensen	MOL005356	Girinimbin	NCOA2
rensen	MOL005376	Panaxadiol	NR3C1
rensen	MOL005384	suchilactone	KCNH2
rensen	MOL005384	suchilactone	SCN5A
rensen	MOL005384	suchilactone	F10
rensen	MOL005384	suchilactone	PTGS2
rensen	MOL005384	suchilactone	F7
rensen	MOL005384	suchilactone	PTPN1
rensen	MOL005384	suchilactone	ADRB2
rensen	MOL005384	suchilactone	HSP90AA1
rensen	MOL005384	suchilactone	NCOA1
rensen	MOL005384	suchilactone	PCP4
rensen	MOL005384	suchilactone	PTGS1
rensen	MOL005384	suchilactone	RXRA
rensen	MOL005384	suchilactone	PDE3A
rensen	MOL005384	suchilactone	ADRA1D
rensen	MOL005384	suchilactone	PRKACA
rensen	MOL005399	alexandrin_qt	PGR
rensen	MOL000787	Fumarine	PTGS1
rensen	MOL000787	Fumarine	CHRM3
rensen	MOL000787	Fumarine	KCNH2
rensen	MOL000787	Fumarine	CHRM1
rensen	MOL000787	Fumarine	SCN5A
rensen	MOL000787	Fumarine	F10
rensen	MOL000787	Fumarine	CHRM5
rensen	MOL000787	Fumarine	PTGS2
rensen	MOL000787	Fumarine	F7
rensen	MOL000787	Fumarine	CHRM4
rensen	MOL000787	Fumarine	OPRD1
rensen	MOL000787	Fumarine	ADRA1B
rensen	MOL000787	Fumarine	ADRB2
rensen	MOL000787	Fumarine	ADRA1D
rensen	MOL000787	Fumarine	OPRM1
rensen	MOL000787	Fumarine	HSP90AA1
rensen	MOL000787	Fumarine	PRKACA
rensen	MOL000787	Fumarine	PCP4
rensen	MOL000787	Fumarine	SLC6A4
rensen	MOL000787	Fumarine	CACNA1S
rensen	MOL000787	Fumarine	PDE3A
rensen	MOL000787	Fumarine	SLC6A3
rensen	MOL000787	Fumarine	PDE4D
rensen	MOL000787	Fumarine	TOP2A
rensen	MOL000787	Fumarine	DRD1
rensen	MOL000787	Fumarine	KDR
wumei	MOL001040	(2R)-5,7-dihydroxy-2-(4-hydroxyphenyl)chroman-4-one	ESR1
wumei	MOL001040	(2R)-5,7-dihydroxy-2-(4-hydroxyphenyl)chroman-4-one	PTGS2
wumei	MOL001040	(2R)-5,7-dihydroxy-2-(4-hydroxyphenyl)chroman-4-one	HSP90AA1
wumei	MOL001040	(2R)-5,7-dihydroxy-2-(4-hydroxyphenyl)chroman-4-one	PRKACA
wumei	MOL001040	(2R)-5,7-dihydroxy-2-(4-hydroxyphenyl)chroman-4-one	DPEP1
wumei	MOL001040	(2R)-5,7-dihydroxy-2-(4-hydroxyphenyl)chroman-4-one	PGR
wumei	MOL001040	(2R)-5,7-dihydroxy-2-(4-hydroxyphenyl)chroman-4-one	NR3C2
wumei	MOL001040	(2R)-5,7-dihydroxy-2-(4-hydroxyphenyl)chroman-4-one	NR3C1
wumei	MOL000358	beta-sitosterol	PGR
wumei	MOL000358	beta-sitosterol	NCOA2
wumei	MOL000358	beta-sitosterol	PTGS1
wumei	MOL000358	beta-sitosterol	PTGS2
wumei	MOL000358	beta-sitosterol	HSP90AA1
wumei	MOL000358	beta-sitosterol	KCNH2
wumei	MOL000358	beta-sitosterol	PRKACA
wumei	MOL000358	beta-sitosterol	DRD1
wumei	MOL000358	beta-sitosterol	CHRM3
wumei	MOL000358	beta-sitosterol	CHRM1
wumei	MOL000358	beta-sitosterol	SCN5A
wumei	MOL000358	beta-sitosterol	CHRM4
wumei	MOL000358	beta-sitosterol	PDE3A
wumei	MOL000358	beta-sitosterol	ADRA1A
wumei	MOL000358	beta-sitosterol	CHRM2
wumei	MOL000358	beta-sitosterol	ADRA1B
wumei	MOL000358	beta-sitosterol	ADRB2
wumei	MOL000358	beta-sitosterol	CHRNA2
wumei	MOL000358	beta-sitosterol	SLC6A4
wumei	MOL000358	beta-sitosterol	OPRM1
wumei	MOL000358	beta-sitosterol	CHRNA7
wumei	MOL000358	beta-sitosterol	BCL2
wumei	MOL000358	beta-sitosterol	BAX
wumei	MOL000358	beta-sitosterol	CASP9
wumei	MOL000358	beta-sitosterol	JUN
wumei	MOL000358	beta-sitosterol	CASP3
wumei	MOL000358	beta-sitosterol	CASP8
wumei	MOL000358	beta-sitosterol	PRKCA
wumei	MOL000358	beta-sitosterol	PON1
wumei	MOL000358	beta-sitosterol	MAP2
wumei	MOL000422	kaempferol	NOS2
wumei	MOL000422	kaempferol	PTGS1
wumei	MOL000422	kaempferol	AR
wumei	MOL000422	kaempferol	PPARG
wumei	MOL000422	kaempferol	PTGS2
wumei	MOL000422	kaempferol	HSP90AA1
wumei	MOL000422	kaempferol	PRKACA
wumei	MOL000422	kaempferol	NCOA2
wumei	MOL000422	kaempferol	DPP4
wumei	MOL000422	kaempferol	PRSS1
wumei	MOL000422	kaempferol	PGR
wumei	MOL000422	kaempferol	F2
wumei	MOL000422	kaempferol	CHRM1
wumei	MOL000422	kaempferol	ACHE
wumei	MOL000422	kaempferol	SLC6A2
wumei	MOL000422	kaempferol	CHRM2
wumei	MOL000422	kaempferol	ADRA1B
wumei	MOL000422	kaempferol	TOP2A
wumei	MOL000422	kaempferol	F7
wumei	MOL000422	kaempferol	PCP4
wumei	MOL000422	kaempferol	RELA
wumei	MOL000422	kaempferol	IKBKB
wumei	MOL000422	kaempferol	AKT1
wumei	MOL000422	kaempferol	BCL2
wumei	MOL000422	kaempferol	BAX
wumei	MOL000422	kaempferol	TNFAIP6
wumei	MOL000422	kaempferol	JUN
wumei	MOL000422	kaempferol	AHSA1
wumei	MOL000422	kaempferol	CASP3
wumei	MOL000422	kaempferol	MAPK8
wumei	MOL000422	kaempferol	MMP1
wumei	MOL000422	kaempferol	STAT1
wumei	MOL000422	kaempferol	CDK1
wumei	MOL000422	kaempferol	PPARG
wumei	MOL000422	kaempferol	HMOX1
wumei	MOL000422	kaempferol	CYP3A4
wumei	MOL000422	kaempferol	SERTAD1
wumei	MOL000422	kaempferol	CYP1A1
wumei	MOL000422	kaempferol	ICAM1
wumei	MOL000422	kaempferol	SELE
wumei	MOL000422	kaempferol	VCAM1
wumei	MOL000422	kaempferol	NR1I2
wumei	MOL000422	kaempferol	CYP1B1
wumei	MOL000422	kaempferol	ALOX5
wumei	MOL000422	kaempferol	HAS2
wumei	MOL000422	kaempferol	AHR
wumei	MOL000422	kaempferol	PSMD3
wumei	MOL000422	kaempferol	SLC2A4
wumei	MOL000422	kaempferol	NR1I3
wumei	MOL000422	kaempferol	INSR
wumei	MOL000422	kaempferol	DIO1
wumei	MOL000422	kaempferol	PPP3CA
wumei	MOL000422	kaempferol	GSTM1
wumei	MOL000422	kaempferol	GSTM2
wumei	MOL000422	kaempferol	AKR1C3
wumei	MOL000422	kaempferol	SLPI
wumei	MOL000449	Stigmasterol	PGR
wumei	MOL000449	Stigmasterol	NR3C2
wumei	MOL000449	Stigmasterol	NCOA2
wumei	MOL000449	Stigmasterol	SERTAD1
wumei	MOL000449	Stigmasterol	IGHG1
wumei	MOL000449	Stigmasterol	RXRA
wumei	MOL000449	Stigmasterol	NCOA1
wumei	MOL000449	Stigmasterol	PTGS1
wumei	MOL000449	Stigmasterol	PTGS2
wumei	MOL000449	Stigmasterol	ADRA2A
wumei	MOL000449	Stigmasterol	SLC6A2
wumei	MOL000449	Stigmasterol	SLC6A3
wumei	MOL000449	Stigmasterol	ADRB2
wumei	MOL000449	Stigmasterol	AKR1B1
wumei	MOL000449	Stigmasterol	PLAU
wumei	MOL000449	Stigmasterol	LTA4H
wumei	MOL000449	Stigmasterol	MAOB
wumei	MOL000449	Stigmasterol	MAOA
wumei	MOL000449	Stigmasterol	PRKACA
wumei	MOL000449	Stigmasterol	CTRB1
wumei	MOL000449	Stigmasterol	CHRM3
wumei	MOL000449	Stigmasterol	CHRM1
wumei	MOL000449	Stigmasterol	ADRB1
wumei	MOL000449	Stigmasterol	SCN5A
wumei	MOL000449	Stigmasterol	ADRA1A
wumei	MOL000449	Stigmasterol	CHRM2
wumei	MOL000449	Stigmasterol	ADRA1B
wumei	MOL000449	Stigmasterol	CHRNA7
wumei	MOL005043	campest-5-en-3beta-ol	PGR
wumei	MOL008601	Methyl arachidonate	PTGS1
wumei	MOL008601	Methyl arachidonate	PTGS2
wumei	MOL000953	CLR	PGR
wumei	MOL000953	CLR	NR3C2
wumei	MOL000953	CLR	NCOA2
wumei	MOL000098	quercetin	PTGS1
wumei	MOL000098	quercetin	AR
wumei	MOL000098	quercetin	PPARG
wumei	MOL000098	quercetin	PTGS2
wumei	MOL000098	quercetin	HSP90AA1
wumei	MOL000098	quercetin	NCOA2
wumei	MOL000098	quercetin	DPP4
wumei	MOL000098	quercetin	AKR1B1
wumei	MOL000098	quercetin	PRSS1
wumei	MOL000098	quercetin	TOP2A
wumei	MOL000098	quercetin	F2
wumei	MOL000098	quercetin	KCNH2
wumei	MOL000098	quercetin	SCN5A
wumei	MOL000098	quercetin	F10
wumei	MOL000098	quercetin	ADRB2
wumei	MOL000098	quercetin	MMP3
wumei	MOL000098	quercetin	PRKACA
wumei	MOL000098	quercetin	F7
wumei	MOL000098	quercetin	RXRA
wumei	MOL000098	quercetin	ACHE
wumei	MOL000098	quercetin	MAOB
wumei	MOL000098	quercetin	RELA
wumei	MOL000098	quercetin	EGFR
wumei	MOL000098	quercetin	AKT1
wumei	MOL000098	quercetin	SERTAD1
wumei	MOL000098	quercetin	CCND1
wumei	MOL000098	quercetin	BCL2
wumei	MOL000098	quercetin	BCL2L1
wumei	MOL000098	quercetin	FOS
wumei	MOL000098	quercetin	CDKN1A
wumei	MOL000098	quercetin	EIF6
wumei	MOL000098	quercetin	BAX
wumei	MOL000098	quercetin	CASP9
wumei	MOL000098	quercetin	PLAU
wumei	MOL000098	quercetin	MMP2
wumei	MOL000098	quercetin	MMP9
wumei	MOL000098	quercetin	MAPK1
wumei	MOL000098	quercetin	IL10RB
wumei	MOL000098	quercetin	RB1
wumei	MOL000098	quercetin	TNFAIP6
wumei	MOL000098	quercetin	JUN
wumei	MOL000098	quercetin	IL6ST
wumei	MOL000098	quercetin	AHSA1
wumei	MOL000098	quercetin	CASP3
wumei	MOL000098	quercetin	TP53
wumei	MOL000098	quercetin	ELK1
wumei	MOL000098	quercetin	NFKBIA
wumei	MOL000098	quercetin	ODC1
wumei	MOL000098	quercetin	CASP8
wumei	MOL000098	quercetin	TOP1
wumei	MOL000098	quercetin	RAF1
wumei	MOL000098	quercetin	SOD1
wumei	MOL000098	quercetin	PRKCA
wumei	MOL000098	quercetin	MMP1
wumei	MOL000098	quercetin	HIF1A
wumei	MOL000098	quercetin	STAT1
wumei	MOL000098	quercetin	RUNX1T1
wumei	MOL000098	quercetin	CDK1
wumei	MOL000098	quercetin	HSPA5
wumei	MOL000098	quercetin	ERBB2
wumei	MOL000098	quercetin	PPARG
wumei	MOL000098	quercetin	ACACA
wumei	MOL000098	quercetin	HMOX1
wumei	MOL000098	quercetin	CYP3A4
wumei	MOL000098	quercetin	CAV1
wumei	MOL000098	quercetin	MYC
wumei	MOL000098	quercetin	F3
wumei	MOL000098	quercetin	GJA1
wumei	MOL000098	quercetin	CYP1A1
wumei	MOL000098	quercetin	ICAM1
wumei	MOL000098	quercetin	IL1B
wumei	MOL000098	quercetin	CCL2
wumei	MOL000098	quercetin	SELE
wumei	MOL000098	quercetin	VCAM1
wumei	MOL000098	quercetin	CXCL8
wumei	MOL000098	quercetin	PRKCB
wumei	MOL000098	quercetin	BIRC5
wumei	MOL000098	quercetin	DUOX2
wumei	MOL000098	quercetin	NOS3
wumei	MOL000098	quercetin	HSPB1
wumei	MOL000098	quercetin	IL2
wumei	MOL000098	quercetin	NR1I2
wumei	MOL000098	quercetin	CYP1B1
wumei	MOL000098	quercetin	CCNB1
wumei	MOL000098	quercetin	PLAT
wumei	MOL000098	quercetin	THBD
wumei	MOL000098	quercetin	SERPINE1
wumei	MOL000098	quercetin	IFNG
wumei	MOL000098	quercetin	ALOX5
wumei	MOL000098	quercetin	IL1A
wumei	MOL000098	quercetin	MPO
wumei	MOL000098	quercetin	TOP2A
wumei	MOL000098	quercetin	NCF1
wumei	MOL000098	quercetin	ABCG2
wumei	MOL000098	quercetin	HAS2
wumei	MOL000098	quercetin	NFE2L2
wumei	MOL000098	quercetin	NQO1
wumei	MOL000098	quercetin	PARP1
wumei	MOL000098	quercetin	AHR
wumei	MOL000098	quercetin	PSMD3
wumei	MOL000098	quercetin	SLC2A4
wumei	MOL000098	quercetin	COL3A1
wumei	MOL000098	quercetin	CXCL11
wumei	MOL000098	quercetin	CXCL2
wumei	MOL000098	quercetin	DCAF5
wumei	MOL000098	quercetin	NR1I3
wumei	MOL000098	quercetin	CHEK2
wumei	MOL000098	quercetin	INSR
wumei	MOL000098	quercetin	CLDN4
wumei	MOL000098	quercetin	PPARA
wumei	MOL000098	quercetin	PPARD
wumei	MOL000098	quercetin	HSF1
wumei	MOL000098	quercetin	CXCL10
wumei	MOL000098	quercetin	CHUK
wumei	MOL000098	quercetin	SPP1
wumei	MOL000098	quercetin	RUNX2
wumei	MOL000098	quercetin	RASSF1
wumei	MOL000098	quercetin	E2F1
wumei	MOL000098	quercetin	E2F2
wumei	MOL000098	quercetin	ACP3
wumei	MOL000098	quercetin	CTSD
wumei	MOL000098	quercetin	IGFBP3
wumei	MOL000098	quercetin	IGF2
wumei	MOL000098	quercetin	CD40LG
wumei	MOL000098	quercetin	IRF1
wumei	MOL000098	quercetin	ERBB3
wumei	MOL000098	quercetin	PON1
wumei	MOL000098	quercetin	DIO1
wumei	MOL000098	quercetin	PCOLCE
wumei	MOL000098	quercetin	NPEPPS
wumei	MOL000098	quercetin	HK2
wumei	MOL000098	quercetin	RASA1
wumei	MOL000098	quercetin	GSTM1
wumei	MOL000098	quercetin	GSTM2
xixin	MOL012140	4,9-dimethoxy-1-vinyl-$b-carboline	PTGS1
xixin	MOL012140	4,9-dimethoxy-1-vinyl-$b-carboline	SCN5A
xixin	MOL012140	4,9-dimethoxy-1-vinyl-$b-carboline	PTGS2
xixin	MOL012140	4,9-dimethoxy-1-vinyl-$b-carboline	RXRA
xixin	MOL012140	4,9-dimethoxy-1-vinyl-$b-carboline	PDE3A
xixin	MOL012140	4,9-dimethoxy-1-vinyl-$b-carboline	HSP90AA1
xixin	MOL012141	Caribine	CHRM3
xixin	MOL012141	Caribine	CHRM1
xixin	MOL012141	Caribine	SCN5A
xixin	MOL012141	Caribine	OPRD1
xixin	MOL012141	Caribine	ADRA1B
xixin	MOL012141	Caribine	ADRA1D
xixin	MOL012141	Caribine	OPRM1
xixin	MOL012141	Caribine	CHRNA7
xixin	MOL001460	Cryptopin	PTGS1
xixin	MOL001460	Cryptopin	DRD1
xixin	MOL001460	Cryptopin	CHRM3
xixin	MOL001460	Cryptopin	KCNH2
xixin	MOL001460	Cryptopin	CHRM1
xixin	MOL001460	Cryptopin	SCN5A
xixin	MOL001460	Cryptopin	F10
xixin	MOL001460	Cryptopin	CHRM5
xixin	MOL001460	Cryptopin	PTGS2
xixin	MOL001460	Cryptopin	F7
xixin	MOL001460	Cryptopin	KDR
xixin	MOL001460	Cryptopin	CHRM4
xixin	MOL001460	Cryptopin	OPRD1
xixin	MOL001460	Cryptopin	PDE3A
xixin	MOL001460	Cryptopin	ADRA1B
xixin	MOL001460	Cryptopin	ADRB2
xixin	MOL001460	Cryptopin	ADRA1D
xixin	MOL001460	Cryptopin	TOP2A
xixin	MOL001460	Cryptopin	OPRM1
xixin	MOL001460	Cryptopin	HSP90AA1
xixin	MOL001460	Cryptopin	PRKACA
xixin	MOL001460	Cryptopin	CACNA1S
xixin	MOL001460	Cryptopin	NCOA1
xixin	MOL001460	Cryptopin	PDE10A
xixin	MOL001460	Cryptopin	PCP4
xixin	MOL001460	Cryptopin	SLC6A4
xixin	MOL001558	sesamin	F10
xixin	MOL001558	sesamin	PTGS2
xixin	MOL001558	sesamin	SCN5A
xixin	MOL001558	sesamin	CCND1
xixin	MOL001558	sesamin	IL10RB
xixin	MOL001558	sesamin	FASN
xixin	MOL001558	sesamin	ACACA
xixin	MOL001558	sesamin	G6PD
xixin	MOL001558	sesamin	NOS3
xixin	MOL001558	sesamin	ECE1
xixin	MOL001558	sesamin	ACADM
xixin	MOL001558	sesamin	CYP2B6
xixin	MOL001558	sesamin	UGT1A1
xixin	MOL001558	sesamin	SREBF1
xixin	MOL001558	sesamin	NOX3
xixin	MOL001558	sesamin	NOX1
xixin	MOL001558	sesamin	ACOX1
xixin	MOL001558	sesamin	ACLY
xixin	MOL001558	sesamin	EHHADH
xixin	MOL001558	sesamin	AUH
xixin	MOL001558	sesamin	HADHB
xixin	MOL002501	[(1S)-3-[(E)-but-2-enyl]-2-methyl-4-oxo-1-cyclopent-2-enyl] (1R,3R)-3-[(E)-3-methoxy-2-methyl-3-oxoprop-1-enyl]-2,2-dimethylcyclopropane-1-carboxylate	PTGS2
xixin	MOL002501	[(1S)-3-[(E)-but-2-enyl]-2-methyl-4-oxo-1-cyclopent-2-enyl] (1R,3R)-3-[(E)-3-methoxy-2-methyl-3-oxoprop-1-enyl]-2,2-dimethylcyclopropane-1-carboxylate	CA2
xixin	MOL002501	[(1S)-3-[(E)-but-2-enyl]-2-methyl-4-oxo-1-cyclopent-2-enyl] (1R,3R)-3-[(E)-3-methoxy-2-methyl-3-oxoprop-1-enyl]-2,2-dimethylcyclopropane-1-carboxylate	NCOA2
xixin	MOL002962	(3S)-7-hydroxy-3-(2,3,4-trimethoxyphenyl)chroman-4-one	NOS2
xixin	MOL002962	(3S)-7-hydroxy-3-(2,3,4-trimethoxyphenyl)chroman-4-one	PTGS1
xixin	MOL002962	(3S)-7-hydroxy-3-(2,3,4-trimethoxyphenyl)chroman-4-one	F2
xixin	MOL002962	(3S)-7-hydroxy-3-(2,3,4-trimethoxyphenyl)chroman-4-one	KCNH2
xixin	MOL002962	(3S)-7-hydroxy-3-(2,3,4-trimethoxyphenyl)chroman-4-one	ESR1
xixin	MOL002962	(3S)-7-hydroxy-3-(2,3,4-trimethoxyphenyl)chroman-4-one	SCN5A
xixin	MOL002962	(3S)-7-hydroxy-3-(2,3,4-trimethoxyphenyl)chroman-4-one	F10
xixin	MOL002962	(3S)-7-hydroxy-3-(2,3,4-trimethoxyphenyl)chroman-4-one	PTGS2
xixin	MOL002962	(3S)-7-hydroxy-3-(2,3,4-trimethoxyphenyl)chroman-4-one	RXRA
xixin	MOL002962	(3S)-7-hydroxy-3-(2,3,4-trimethoxyphenyl)chroman-4-one	ACHE
xixin	MOL002962	(3S)-7-hydroxy-3-(2,3,4-trimethoxyphenyl)chroman-4-one	ADRA1B
xixin	MOL002962	(3S)-7-hydroxy-3-(2,3,4-trimethoxyphenyl)chroman-4-one	ADRB2
xixin	MOL002962	(3S)-7-hydroxy-3-(2,3,4-trimethoxyphenyl)chroman-4-one	ADRA1D
xixin	MOL002962	(3S)-7-hydroxy-3-(2,3,4-trimethoxyphenyl)chroman-4-one	TOP2A
xixin	MOL002962	(3S)-7-hydroxy-3-(2,3,4-trimethoxyphenyl)chroman-4-one	ESR2
xixin	MOL002962	(3S)-7-hydroxy-3-(2,3,4-trimethoxyphenyl)chroman-4-one	DPP4
xixin	MOL002962	(3S)-7-hydroxy-3-(2,3,4-trimethoxyphenyl)chroman-4-one	HSP90AA1
xixin	MOL002962	(3S)-7-hydroxy-3-(2,3,4-trimethoxyphenyl)chroman-4-one	CDK2
xixin	MOL002962	(3S)-7-hydroxy-3-(2,3,4-trimethoxyphenyl)chroman-4-one	PRKACA
xixin	MOL002962	(3S)-7-hydroxy-3-(2,3,4-trimethoxyphenyl)chroman-4-one	PRSS1
xixin	MOL002962	(3S)-7-hydroxy-3-(2,3,4-trimethoxyphenyl)chroman-4-one	CCNA2
xixin	MOL002962	(3S)-7-hydroxy-3-(2,3,4-trimethoxyphenyl)chroman-4-one	NCOA2
xixin	MOL002962	(3S)-7-hydroxy-3-(2,3,4-trimethoxyphenyl)chroman-4-one	PCP4
xixin	MOL000422	kaempferol	NOS2
xixin	MOL000422	kaempferol	PTGS1
xixin	MOL000422	kaempferol	AR
xixin	MOL000422	kaempferol	PPARG
xixin	MOL000422	kaempferol	PTGS2
xixin	MOL000422	kaempferol	HSP90AA1
xixin	MOL000422	kaempferol	PRKACA
xixin	MOL000422	kaempferol	NCOA2
xixin	MOL000422	kaempferol	DPP4
xixin	MOL000422	kaempferol	PRSS1
xixin	MOL000422	kaempferol	PGR
xixin	MOL000422	kaempferol	F2
xixin	MOL000422	kaempferol	CHRM1
xixin	MOL000422	kaempferol	ACHE
xixin	MOL000422	kaempferol	SLC6A2
xixin	MOL000422	kaempferol	CHRM2
xixin	MOL000422	kaempferol	ADRA1B
xixin	MOL000422	kaempferol	TOP2A
xixin	MOL000422	kaempferol	F7
xixin	MOL000422	kaempferol	PCP4
xixin	MOL000422	kaempferol	RELA
xixin	MOL000422	kaempferol	IKBKB
xixin	MOL000422	kaempferol	AKT1
xixin	MOL000422	kaempferol	BCL2
xixin	MOL000422	kaempferol	BAX
xixin	MOL000422	kaempferol	TNFAIP6
xixin	MOL000422	kaempferol	JUN
xixin	MOL000422	kaempferol	AHSA1
xixin	MOL000422	kaempferol	CASP3
xixin	MOL000422	kaempferol	MAPK8
xixin	MOL000422	kaempferol	MMP1
xixin	MOL000422	kaempferol	STAT1
xixin	MOL000422	kaempferol	CDK1
xixin	MOL000422	kaempferol	PPARG
xixin	MOL000422	kaempferol	HMOX1
xixin	MOL000422	kaempferol	CYP3A4
xixin	MOL000422	kaempferol	SERTAD1
xixin	MOL000422	kaempferol	CYP1A1
xixin	MOL000422	kaempferol	ICAM1
xixin	MOL000422	kaempferol	SELE
xixin	MOL000422	kaempferol	VCAM1
xixin	MOL000422	kaempferol	NR1I2
xixin	MOL000422	kaempferol	CYP1B1
xixin	MOL000422	kaempferol	ALOX5
xixin	MOL000422	kaempferol	HAS2
xixin	MOL000422	kaempferol	AHR
xixin	MOL000422	kaempferol	PSMD3
xixin	MOL000422	kaempferol	SLC2A4
xixin	MOL000422	kaempferol	NR1I3
xixin	MOL000422	kaempferol	INSR
xixin	MOL000422	kaempferol	DIO1
xixin	MOL000422	kaempferol	PPP3CA
xixin	MOL000422	kaempferol	GSTM1
xixin	MOL000422	kaempferol	GSTM2
xixin	MOL000422	kaempferol	AKR1C3
xixin	MOL000422	kaempferol	SLPI
xixin	MOL009849	ZINC05223929	PTGS2
xixin	MOL009849	ZINC05223929	PCP4
xixin	MOL009849	ZINC05223929	F10
xixin	MOL009849	ZINC05223929	RXRA
