# Supplementary material for: Exploration of the Potential Mechanisms of Wumei Pill for the Treatment of Ulcerative Colitis by Network Pharmacology
Source: Gastroenterol Res Pract. 2021 Dec 21;2021:4227668. doi: 10.1155/2021/4227668 (PMC8714398; doi:10.1155/2021/4227668)
Supplement: Supplementary Materials — The 129 active ingredients of WMP and the 1710 target can be found in supplementary A and supplementary B, respectively. Target genes related to UC can be found in supplementary C. [file 4227668.f1.zip › supplementary C.txt]

Supplementary C: 622 target genes related to UC

Target gene
NOD2
IL6
IL10
IL23R
TNF
HLA-DRB1
TLR4
IL1B
ABCB1
IL10RA
CXCL8
INAVA
MPO
IL1RN
HLA-B
IL2
IFNG
ATG16L1
IRF5
PRKCQ
CTLA4
CRP
TP53
PLA2G4A
TLR2
IRGM
SYK
MLH1
MEFV
IL4
FAS
CCR6
CTNNB1
MST1
IL10RB
IL17A
SLC11A1
TGFB1
RELA
ELANE
BTNL2
ICAM1
PTGS2
STAT4
TNFAIP3
GAST
AKT1
TNFSF15
SMAD4
PPARG
SMAD7
MUC2
STAT3
PRTN3
MSH2
MMP1
IL13
IL1R1
LTF
CHEK2
GPR35
TNFRSF1A
TPMT
NLRP3
IL22
VEGFA
MSH6
PSTPIP1
MMP9
HLA-DQB1
FOXP3
CDH1
S100A8
IL21
MYO9B
CCR3
TCF4
REL
ZFP90
CD4
NOS2
APC
REG4
CTSG
CYP2C19
NFKB1
PTGS1
IL23A
PTPN22
ALB
JAK2
HRH2
LACC1
S100A12
SMAD3
CYBC1
IL18
CLDN18
NCF4
BPI
SST
ERAP1
IL12A
CARD9
NOD1
TNFRSF1B
PIK3CA
CIITA
CAT
C4A
CCR1
IL37
SLC22A4
ATP4A
HLA-A
CCL2
CARD8
KRAS
SLC22A5
CLDN2
F5
DEFB4A
SOCS1
DUOX2
CARMIL2
CCL11
MUC12
IL2RA
NGF
F2
UCN
MET
IL12B
BRAF
CHGA
NTRK1
CD40LG
EGF
FGFR2
FGF2
IL1A
UBAC2
FASLG
KLRC4
ICOSLG
CCND1
RIPK1
KIF1A
NCF1
IL7R
TFF3
HLA-DQA1
SLC37A4
MIR21
CDKN1A
HMOX1
H19
NKX2-3
TIMP1
TLR5
IBD3
IFNG-AS1
BAX
S100A9
VDR
XIAP
CXCL5
PTEN
CD8A
CSF2
ITGB4
POLD1
MTHFR
APOH
LTA
FGFR3
PLCG2
HP
TLR9
MMP2
BACH2
FCGR2A
TFF2
ITGB2
MIF
RTEL1
MIR126
ERBB2
STAT1
PYY
CDKN1B
RNASE3
PTPN2
PDGFB
SERPINC1
ACE
SERPINE1
IBD21
TFF1
CCL5
CCN2
SLC6A4
CP
IL17F
CLDN4
PTGER4
FERMT1
LOC106029312
MVK
HLA-C
MMP3
CD40
CXCL10
ATP12A
IL5
ATM
MADCAM1
NCF4-AS1
XDH
SPP1
IBD5
MIR143
CALCA
MICA
CFB
PSC
MASP2
MIR34A
IL15
FOXD2-AS1
VCAM1
CD14
CYP2C9
DEFA5
ZAP70
MAP3K7
DLG5
HGF
PTPRC
BCL10
PLA2G2A
RET
MIR145
IGF2
CYP3A4
CDKN2A
CD79A
PALB2
INS
PLG
IBD2
HLA-DRA
NFKBIA
LAMB1
MUC5AC
TERT
CCK
EPX
ITGA4
EPCAM
LCN2
CCR5
HPS1
CD80
CASP1
EP300
CCT5
MICB
MIR141
FCGR3A
HIF1A
CXCR2
CYLD
SCT
GRP
CCL20
CDKN2B
NAT2
TACR1
EGFR
IL21-AS1
CD28
TYK2
IL26
MLN
IL11
RIPK2
SELE
KRT7
CCL3
HSPA1L
ITGAL
VIP
HPS4
WRN
CYP2D6
FUT2
RASGRP1
IL33
CSF3
ARID1A
TCN2
IL1RAPL2
FGF7
IBD8
ITGAM
CASP10
FGF10
TAC1
RTEL1-TNFRSF6B
CXCL2
MT-CO1
TAP2
SOD1
TAP1
POLE
CXCL1
FCGR3B
SOCS3
PDCD1
LRBA
CD55
FN1
CDH3
IBD7
TJP1
TLR3
AXIN2
CYP1A2
LGALS3
HLA-DPB1
BRCA1
PECAM1
TGM2
HNF4A
IFNGR1
PIK3R1
ALOX5
GHRL
TAPBP
IGF1
AURKA
IKZF1
PMS2
IBD6
MLH3
SH2D1A
BLM
NR1I2
SRC
GSTM1
BRINP3
IL27
CDX2
RAB7A
PRKCD
CHUK
AQP8
CRHR2
DCLRE1C
GSTP1
BCL2
TREX1
IL19
STAT6
SLC26A3
MUC6
MIR140
WAS
ODC1
STAT5B
DEFB1
F3
NRAS
MT-CYB
PDGFRL
CD86
DMBT1
NR1H4
HSPA4
MYC
BRCA2
SELP
TOR1A
GREM1
MIR127
SOD2
COL7A1
MKI67
RNF186
PRF1
ARID1B
PRSS1
HMGB1
MBL2
CXCR1
IL12RB2
JAK1
MYO1B
ITGAX
IBD9
IBD4
SELL
SKIV2L
MIR192
IL18RAP
MIR203A
INS-IGF2
HPS3
PLAU
KRT20
CAV1
SOX9
LEPR
STXBP2
RFX5
AGER
GUSB
PTPN11
INPP5D
TMEFF2
CTNNA1
MUTYH
OTUD3
SRP54
IBD16
IBD20
IBD27
IBD18
IBD11
IBD12
IBD15
IBD22
IBD23
IBD24
IBD26
AQP5
TGFA
F13A1
PTPN12
TRAF3IP2
CYBA
STAT5A
DCC
LEP
LIFR
CYP3A5
IDO1
MUC1
MIRLET7A1
BGLAP
ADA
MUC3A
THBD
HLA-DPA1
CLEC7A
CHI3L1
ERCC6
MMP7
MIR26A1
LGR5
LMNA
IRF1
TNFRSF6B
IL17RA
F2RL1
CDC42
LOC110806262
ORMDL3
MIR146A
SERPINA1
AP3B1
MIR4284
CCR9
IRAK1
ATRIP
IFNA1
RBFOX1
IL6R
RUNX3
VWF
CXCL12
BUB1B
BUB1
SLC9A3
HSPD1
JUN
NLRP12
PLA2G2E
DNMT1
TET2
CYBB
GALNT12
TREM1
MIR451A
MIR215
IBD25
BCL2L1
NFE2L2
IFIH1
POMC
FBXW7
DMD
MMP13
CCNY
IRF8
DEFB103B
MT-ND4L
HLA-E
ESR1
HRAS
NTS
NQO1
MIR34C
GJB6
ICAM3
PUS10
CD27
GBA
MT-CO2
GSDMB
CXCR3
IFNA2
HLA-DRB9
CLDN8
GPX1
FCGR2B
GSTT1
HLA-G
BRIP1
TCERG1
NOTCH1
CYP1A1
HSPA2
IL3
C4B
ABCG2
ITGB1
CCKBR
KIT
NR3C1
IL6ST
GNAS
KIF21B
PON1
MTR
MYB
FOS
ECM1
MYAS1
SLC28A3
BTG2
C4orf54
MPL
THPO
BTG1
HCG22
MUCL3
MUC22
SLC29A1
SLC28A1
SLC28A2
SLC29A3
SLC29A4
SLC29A2
PDF
MTOR
CDK4
CDK6
JAK3
S1PR1
ITGB7
GUCY2C
CELA1
RPS6KB1
IL13RA2
NFKB2
ITGA4-ITGB1
Bact FimH
CYP2B6
CYP2C8
CYP19A1
CYP3A7
CYP2A6
CYP1B1
SERPINA6
ABCB11
ANXA1
SLCO1A2
SLC22A8
SCN10A
PTGER1
NR0B1
ABCC2
CYP17A1
CYP2E1
CYP3A43
CYP4A11
CYP11B1
HSD11B2
SHBG
CYP11B2
AKR1D1
SRD5A2
HSD11B1
HSD3B1
HPRT1
ABCC4
ABCC5
AOX1
PPAT
IMPDH1
IKBKB
nat
NAT1
AKR1C1
GGCX
CYP4F2
UBIAD1
VKORC1
MC2R
BCHE
